# Supplementary material for: Behaviours preceding suicides at railway and underground locations: a multimethodological qualitative approach
Source: PubMed Central journal article supplement — BMJ Open. 2018 Apr 10;8(4):e021076. doi: 10.1136/bmjopen-2017-021076 (PMC5898325; doi:10.1136/bmjopen-2017-021076), 2018-04-10
Supplement: bmjopen-2017-021076.draft_revisions.pdf [file bmjopen-2017-021076.draft_revisions.pdf]

# BMJ Open

BMJ Open is committed to open peer review. As part of this commitment we make the peer review history of every article we publish publicly available.

When an article is published we post the peer reviewers' comments and the authors' responses online. We also post the versions of the paper that were used during peer review. These are the versions that the peer review comments apply to.

The versions of the paper that follow are the versions that were submitted during the peer review process. They are not the versions of record or the final published versions. They should not be cited or distributed as the published version of this manuscript.

BMJ Open is an open access journal and the full, final, typeset and author-corrected version of record of the manuscript is available on our site with no access controls, subscription charges or pay-per-view fees (<http://bmjopen.bmj.com>).

If you have any questions on BMJ Open's open peer review process please email [info.bmjopen@bmj.com](mailto:info.bmjopen@bmj.com)

# BMJ Open

## Understanding Railway Suicide: A multi-methodological analysis of behavioural antecedents.

|                               |                                                                                                                                                                                                                                                                                                                                                                                                                                                   |
|-------------------------------|---------------------------------------------------------------------------------------------------------------------------------------------------------------------------------------------------------------------------------------------------------------------------------------------------------------------------------------------------------------------------------------------------------------------------------------------------|
| Journal:                      | <i>BMJ Open</i>                                                                                                                                                                                                                                                                                                                                                                                                                                   |
| Manuscript ID                 | bmjopen-2017-021076                                                                                                                                                                                                                                                                                                                                                                                                                               |
| Article Type:                 | Research                                                                                                                                                                                                                                                                                                                                                                                                                                          |
| Date Submitted by the Author: | 11-Dec-2017                                                                                                                                                                                                                                                                                                                                                                                                                                       |
| Complete List of Authors:     | Mackenzie, Jay-marie; University of Westminster, Psychology<br>Borrill, Jo; University of Westminster, Psychology<br>Hawkins, Emily; King's College London School of Medical Education, Mental Health<br>Fields, Bob; Middlesex University, Computer Science<br>Kruger, Ian; Middlesex University, Psychology<br>Noonan, Ian; King's College London School of Medical Education, Mental Health<br>Marzano, Lisa; Middlesex University, Psychology |
| Keywords:                     | Suicide & self-harm < PSYCHIATRY, MENTAL HEALTH, QUALITATIVE RESEARCH, PUBLIC HEALTH                                                                                                                                                                                                                                                                                                                                                              |
|                               |                                                                                                                                                                                                                                                                                                                                                                                                                                                   |

SCHOLARONE™  
Manuscripts

1  
2  
3 **Understanding Railway Suicide: A multi-methodological analysis of**  
4 **behavioural antecedents.**  
5  
6  
7  
8  
9

10  
11 Dr Jay-Marie, Mackenzie, PhD, Department of Psychology, University of Westminster, 115  
12 New Cavendish Street, London, W1W 6UW, Telephone 020 7911 5000,  
13 J.C.Mackenzie@westminster.ac.uk  
14

15 Dr Jo Borrill, PhD, Department of Psychology, University of Westminster London

16 Emily Hawkins, MSc, Department of Mental Health, Kings College London

17  
18 Dr Bob Fields, PhD, Department of Computer Science, University of Middlesex London

19 Ian Kruger, MSc, Department of Psychology, University of Middlesex London

20 Ian Noonan, MSc, Department of Mental Health, Kings College London

21  
22 Dr Lisa Marzano, PhD, Department of Psychology, University of Middlesex London  
23  
24  
25

26 **Key words:** Suicide and self-harm, Mental Health, Qualitative Research, Public Health  
27  
28  
29

30 Word count 4456  
31  
32  
33  
34  
35  
36  
37  
38  
39  
40  
41  
42  
43  
44  
45  
46  
47  
48  
49  
50  
51  
52  
53  
54  
55  
56  
57  
58  
59  
60

## Abstract

**Objectives:** Suicides by train are relatively rare, but have devastating consequences for families, the rail industry, staff dealing with the aftermath of such incidents, and potential witnesses. To reduce suicides and suicide attempts by rail it is important to learn how safe interventions can be made. However, very little is known about how to identify someone who may be about to make a suicide attempt in these locations. The current research employed a novel way of understanding what behaviours might immediately precede a suicide or suicide attempt at a railway location (including underground/subways).

**Design and Methods:** A qualitative thematic approach was used. Data were gathered from several sources including: interviews with individuals who survived a rail suicide attempt (N=9); CCTV footage of individuals who died by rail suicide (N=16); and qualitative survey data providing views from rail staff (N=79).

**Results:** Our research suggests there are several behaviours that people may carry out before a suicide or suicide attempt at a rail location including: station hopping and platform switching; limiting contact with others; positioning themselves at the end of the track where the train/tube approaches; allowing trains to pass by; and carrying out repetitive behaviours.

**Conclusions:** There are several behaviours that may be identifiable in the moments leading up to a suicide or suicide attempt on the railways, which may present opportunities for intervention. These findings have implications for several stakeholders including rail providers, transport police and other organisations focused on suicide prevention.

## Strengths and limitations

- By mapping together three data sources this study took a novel approach to understanding what behaviours might precede a suicide or suicide attempt at a railway location, thus resultingly provides a more complete picture of what behaviours might precede a suicide or suicide attempt at a railway/subway location.
- There are some distinct similarities, and ‘triangulation’, in the findings of the three studies reported, which strengthen their conclusions.
- Due to difficulties with accessing this type of data our sample sizes are limited, therefore findings are unlikely to be generalisable across all railway and underground locations.

## Introduction

Suicides on the railway and underground network in the United Kingdom (UK) are of great concern to the railway industry, putting a financial strain on the service, as well as emotional strain on their staff, including British Transport Police (BTP) Officers<sup>1</sup>. Between 2015-2016 278 people died by suicide or suspected suicide on UK railways and undergrounds<sup>2</sup>, with over 1100 interventions taking place to prevent a suicide<sup>3</sup>. The UK rail industry have their own suicide prevention strategy, and work closely with organisations such as the Samaritans<sup>1</sup> and BTP to understand and prevent suicides<sup>4</sup>. Researchers have tried to understand who might be at risk of suicide on the railways, and what environmental factors might play a role in suicides on the railways. Being male, living close to a railway, and having a diagnosed psychiatric illness, have all been established to increase the risk<sup>5</sup>. The time of year and time of day has also been linked to suicide risk<sup>5</sup>.

Individuals' behaviours immediately preceding a suicide attempt are a crucial element of the suicidal process, i.e. the multidimensional sequence of events by which suicidal ideas become plans, and plans are then acted upon<sup>6</sup>. Understanding behaviour before an attempt on the railways is thus a key aspect of understanding why and how individuals attempt suicide using this method. Yet there is very little research into this<sup>5</sup>, and existing research tends to focus on the perspectives of witnesses and staff present at the time of the suicide. For example, research that has gathered the views of police officers suggests that behaviours associated with subsequent suicide attempts include: leaving behind belongings; avoiding eye contact; erratic movements; erratic communication and confusion. Other behaviours include: being under the influence of alcohol; wandering around; and unusual clothing<sup>7</sup>. This type of research tells us about some of the potential behaviour that may precede a railway suicide, however it relies on interpretation by a third party and may be subject to memory bias. In this context, the accounts of individuals who have survived an attempt on the rails can offer some important insights, and help triangulate the findings of research focusing on staff/witnesses, but are also subject to poor recall.

Structured analyses of Close Circuit Television (CCTV) data can usefully complement witness and survivor accounts of the events, decisions and behaviours leading up to a suicidal attempt on the rails, particularly the moments immediately preceding the act. In addition, this

---

<sup>1</sup> A UK based suicide prevention charity.

1  
2  
3 method may lead to identifying discernible circumstances and patterns of behaviour in the  
4 lead up to an incident which may assist staff in preventing suicide on the railways. This  
5 information could feed directly into staff training and inform new initiatives to reduce suicide  
6 on the railways, including computer software capable of detecting 'high risk' behaviour from  
7 live CCTV data. However, there have been few previous attempts to use rail suicide CCTV  
8 data for these purposes<sup>5</sup>, and their primary focus has been limited to identifying how suicidal  
9 individuals position themselves on the tracks<sup>8,9</sup>. There are no publications which incorporate  
10 an analysis of CCTV data of people who have died by rail suicide with first-hand accounts of  
11 suicidal behaviour at railway locations, from the perspectives of those who have survived and/or  
12 witnessed such behaviour at railway locations.

13  
14  
15  
16  
17  
18  
19  
20 The aim of the current study was to identify behaviours that may precede a suicide or suicide  
21 attempt on the railway or underground using multiple data sources: CCTV footage of rail  
22 suicides; interviews with individuals who have attempted suicide on the railway; and  
23 accounts from staff working in railway settings.

## 24 25 26 27 28 **Methods**

### 29 30 **Design**

31  
32 Three parallel studies were carried out to understand what behaviours may precede a suicide  
33 or suicide attempt, using multiple perspectives (i.e. CCTV, interviews with survivors and  
34 comments from staff working in rail locations). This work forms part of a wider study into  
35 why people choose to end their lives on the railways (See: *The QUEST study*,  
36 <http://questcoding.wikispaces.com/>). Railways included both rail and underground networks  
37 across the UK. This study was approved by the research Ethics Committees at Middlesex,  
38 Westminster and King's College London Universities granted ethical approval for this  
39 research.

40  
41  
42  
43  
44  
45  
46 **CCTV study:** We carried out a structured analysis of CCTV data of individuals (13 males and  
47 3 females) who took their life on the rails in 2013. BTP provided 16 clips of fatal attempts at  
48 railway stations (N=3) and underground stations (N=13). In relation to each incident, the  
49 footage includes all or edited<sup>2</sup> CCTV data - from the moment the person came to the train or  
50

---

51  
52  
53  
54  
55 <sup>2</sup> Some data were shortened by BTP if the footage was over 1 hour. Where station hopping occurred, clips  
56 from stations were added together. No footage of individuals actually travelling on the railways/tubes was  
57 available.

tube station (or when they first appear on CCTV) up to the moment of death (this ranged between two minutes and 12 hours, with the average footage lasting 30 minutes).

*Analysis:* Analysis of these CCTV data involved coding and making detailed notes for every two-minute segments of footage<sup>10</sup>. The initial coding scheme was developed using an iterative coding process, based on emerging interview and survey findings, and existing evidence; and was refined as the study progressed. Our aim was to analyse people's behaviour before taking their lives on the railways. To ensure inter-observer reliability the initial coding was conducted by one author (JM) and checked for consistency by a second author (JB), both are experienced qualitative researchers who specialise in suicide. The final coding scheme was agreed by three authors (JM, LM, JB) (See Table 1).

**Table 1: CCTV coding scheme**

| Code number | Code                                                                    |
|-------------|-------------------------------------------------------------------------|
| Code 1      | <i>Position of the person on the platform</i>                           |
| Code 2      | <i>Were other people/potential bystanders present?</i>                  |
| Code 3      | <i>Did the person interact with others?</i>                             |
| Code 4      | <i>Behaviour/body language</i>                                          |
| Code 5      | <i>How many trains went by in both directions before each incident?</i> |
| Code 6      | <i>Comparison with other passengers' behaviour</i>                      |
| Code 7      | <i>Do other passengers appear to notice anything suspicious?</i>        |

**Interviews:** Interviews were carried out as part of a wider study into why people consider or attempt to end their lives on the railways (*The QUEST study*). Participants for the current research included nine UK nationals (six males and three females) who spoke about their behaviour preceding a suicide attempt at a railway or underground location. Participants'

1  
2  
3 ages ranged from 18 to 72 years, with most describing themselves as white British and one  
4 British Indian. Participants were recruited through an online survey and through the BTP.  
5  
6 Depending on preference and location of the participant, interviews were conducted either  
7  
8 face-to-face in University premises or in a private room at a local Samaritans' branch, or over  
9  
10 the telephone. Interviews were conducted by JM or JB.

11  
12 A semi-structured interview schedule was used to explore participants' experiences of  
13  
14 attempting suicide on the railways, and for the current study focus was given to behaviours  
15  
16 immediately preceding an attempt/planned attempt when at a station.

17  
18 *Analysis:* Interviews were audio recorded, transcribed verbatim, and then analysed for both  
19  
20 semantic and latent themes using an inductive thematic approach<sup>11, 12</sup>. Identifiable  
21  
22 information was removed to ensure participant anonymity. Transcripts were read at least  
23  
24 twice, summarised, and major themes recorded. Data coding was iterative: a coding frame  
25  
26 was developed based on analysis of the first interview transcript, and then refined based on  
27  
28 subsequent transcripts, until themes were finalised. NVivo 10 was used in the final stages of  
29  
30 coding to assist with this process. Coding and final themes were checked for consistency by  
31  
32 two authors (JB and JM). No participants were previously known to either of the coders.

33  
34 **Online Staff Survey:** The aim of this survey was to gain a better understanding of railway  
35  
36 suicidal behaviour from a front-line perspective, using both structured and open-ended  
37  
38 questions. The 39-item survey covered several key areas, including: demographics, relevant  
39  
40 training, views and experiences of suicidal behaviour on the railways, and suggestions for  
41  
42 prevention. The current research focussed on drawing out what behaviours staff reported as  
43  
44 potentially preceding a suicide or suicide attempt on the rails.

45  
46 The survey was piloted with a small number of Network Rail staff, after which purposive  
47  
48 sampling was used to recruit respondents via the railways intranet. A link to the questionnaire  
49  
50 was sent, along with a briefing document, to specific points of contact within the rail industry  
51  
52 through the suicide prevention duty holders group, who then shared the link with their  
53  
54 respective organisations. The target population included employees in all roles, in all railway  
55  
56 environments across the country, including transport police. No employees were excluded  
57  
58 from the study but briefings focused on front line operational staff as they are more often  
59  
60 involved either directly or indirectly with suicide incidents.



1  
2  
3 Responses were received from 140 staff, from a wide range of disciplines within the railway  
4 industry, with experience ranging from 2-39 years. A total of 79 participants responded  
5 within the three-month time frame set for data collection and were therefore included in the  
6 full analysis of the study. The additional 61 responses received outside of the data collection  
7 period were scanned for additional themes but were suggestive of data saturation and  
8 therefore the full analysis focussed on the initial 79 responses. Of these 26 had direct  
9 experience of dealing with suicidal behaviour (including fatal attempts) on the rails.  
10  
11  
12  
13

14  
15 *Analysis:* A qualitative design was used to collect complex textual descriptions and allow for  
16 explanations of the themes found in the data to support the discovery of ‘norms’<sup>13</sup> that seek to  
17 understand how railway employees experience railway suicides. Responses were analysed  
18 thematically<sup>11</sup> with a focus on semantic codes. Both open and axial coding techniques were  
19 used. The content and context of the text were analysed and the identified codes were collated  
20 into themes. These themes were reviewed, integrated where necessary and refined to produce  
21 clear definitions on which to base the final themes<sup>11</sup>. All coding was carried out by one  
22 author (EH) and checked for consistency by a second author (IN) who is experienced in  
23 qualitative research. No participants were previously known to the coders.  
24  
25  
26  
27  
28  
29

## 30 **Results**

31 Five main themes were derived from the analysis of CCTV footage: ‘station hopping and  
32 platform switching,’ ‘limited contact with people,’ ‘allowing train to pass by,’ ‘position when  
33 jumping/getting onto the tracks,’ and ‘repetitive behaviours.’ Each is discussed below with  
34 comments from participants who survived a suicide attempt on the railways, and from staff  
35 who completed the online survey. A sixth theme, ‘trying to look normal,’ emerged from the  
36 interview data and is discussed with reference to the CCTV analysis and staff comments.  
37  
38  
39  
40  
41  
42

### 43 **Station hopping and platform switching**

44 Five of the sixteen clips we analysed (two clips did not provide sufficient footage) showed  
45 people who travelled between two or more stations before their suicide. An additional two  
46 clips showed individuals leaving the station building and then returning to the same station.  
47 Some individuals (N=3) moved between platforms at the same location. Several reasons  
48 could explain this behaviour, including that these individuals might be looking for a quiet  
49 location, going to a specific location, or preparing themselves mentally to end their lives. It is  
50 difficult to fully understand the state of mind of individuals who move between platforms  
51  
52  
53  
54  
55  
56  
57  
58  
59  
60

1  
2  
3 and/or stations, however two interview participants mentioned their reasoning/thoughts when  
4 carrying out these behaviours:  
5  
6

7  
8 *“I walked for a while and I walked around X [station] first because I’d wondered*  
9 *about jumping there and then I ended up at Y [nearby station], I don’t know why, I*  
10 *just did. But a few hours of trying to think and not being able to think, wandering*  
11 *round stations, on and off platforms, in between barriers, just really quite stressed*  
12 *and confused.” (Interviewee A6)*  
13  
14

15  
16  
17 *“And then I was... I got worried that they might be watching on CCTV... So I got on a*  
18 *train and I got off at X [station] ... And then I repeated the process there.”*  
19 *(Interviewee A8)*  
20  
21  
22

23  
24 There was no mention of station hopping or platform switching in the staff survey data,  
25 indicating that respondents may not have been aware that this behaviour can potentially  
26 precede a suicide or suicide attempt.  
27  
28

### 29 30 31 **Limited contact with people**

32 The majority of individuals in the CCTV footage positioned themselves away from others.  
33 Only one clip showed an individual interacting with a member of the public, having  
34 instigated contact with another passenger. Most individuals in the clips looked down at the  
35 ground and away from other people. Eleven clips showed that other people were present  
36 when the person jumped/got on the tracks. One clip showed no one else being present, and  
37 three clips did not provide enough visibility to judge.  
38  
39

40  
41  
42  
43  
44 Two interview participants mentioned trying to avoid being seen by other people when they  
45 were about to attempt suicide to avoid an intervention:  
46  
47

48  
49 *“I didn’t want other people around to see and I thought there was no-one else on the*  
50 *platform but someone came through.” And “... timing of the day. I’d looked around,*  
51 *I’d looked up the escalators, I’d looked in the corridor, I hadn’t been able to see*  
52 *anyone – I don’t know where they came from, I didn’t see them on the platform – but*  
53 *I’d looked around, I’d waited, I’d left the platform when there were people there, I’d*  
54  
55  
56  
57

1  
2  
3 *come back. I thought I'd looked to see if there was CCTV as well and I hadn't seen*  
4 *any so yeah." (Interviewee A6)*  
5  
6

7  
8 *"I was like waiting for like people to be off the platform before I did anything. And I*  
9 *was also kind of worried that people like who saw me were like, "He looks a bit*  
10 *weird", so I'm going to stay down here. So there was no one near me." (Interviewee*  
11 *A8)*  
12  
13  
14

15  
16 In contrast, findings from the staff survey indicate that some people may approach staff.  
17 Staff were asked if they had ever spoken to a suicidal person on or near a station. All but one  
18 of the 79 participants responded: 67% (N=52) had indirect experience of dealing with suicide  
19 on the rails and 33% (N=26) reported having had direct contact with a suicidal person, in  
20 some cases having been approached by a suicidal individual:  
21  
22  
23

24  
25 *"Many have approached me. They have told me they don't feel right or that they are*  
26 *feeling like they want to do something stupid, or just they want to kill themselves"*  
27  
28 (BT Police Officer, 11-15 years in job)  
29  
30  
31

### 32 **Position when jumping/getting onto tracks**

33 In the 16 clips we analysed, 14 people jumped/got onto the tracks at the end of the platform  
34 where the train approaches. Two individuals jumped/got onto the tracks at the non-  
35 approaching end. No individuals jumped/got onto the tracks from the middle of the platform.  
36 Several people positioned themselves at the approaching end of the platform very close to  
37 barriers and waited for the train to arrive, whereas some individuals moved back and forth  
38 along the platform, moving to the approaching end when the train arrived.  
39  
40  
41  
42  
43  
44

45 Three interview participants mentioned their position on the platform. These participants  
46 reported that they had chosen a particular station/tube station because they could get close to  
47 the approaching end and near to the 'tunnel' opening. One participant felt that getting close to  
48 the tunnel would reduce the likelihood that the driver would spot him (and brake):  
49  
50  
51  
52

53 *"...There's a way back down towards the tunnel, and I assumed that would be an*  
54 *easier place to jump across without the train driver seeing me." (Interviewee A5)*  
55  
56  
57  
58  
59  
60

1  
2  
3 *“It was one of those platforms that goes right up to the tunnel – I’d chosen it*  
4 *specifically for that reason.” (Interviewee A6)*  
5  
6

7  
8 Staff (14%, N=18) also identified individuals being positioned towards the approaching end  
9 of the tunnel as a warning sign (see figures 1 & 2). Twelve staff respondents also mentioned  
10 that individuals would stand close to the platform edge:  
11

12  
13  
14 *“I noticed a lady once at (\*\*\*\*\*) station standing very close to the edge. The*  
15 *behaviour seemed very strange as she took her coat off and folded it up then put her*  
16 *handbag down, then stood near the edge of the platform. I asked the lady if she was*  
17 *ok and mentioned that she should stand behind the yellow line, after this she just put*  
18 *her coat back on and left the station”*  
19  
20

21  
22 (Role redacted to protect anonymity, 15+ years in job)  
23

#### 24 **Allowing trains to pass by**

25 Eight clips showed individuals allowing trains to pass by (three clips did not show sufficient  
26 footage, four clips showed no trains passing on the same platform). The individuals in these  
27 clips often spent a substantial amount of time at the platforms in comparison to those who  
28 jumped/got onto the tracks in front of the first train that arrived (N=5). Several reasons could  
29 be suggested for this behaviour, such as mentally preparing oneself to end one’s life or  
30 waiting for the platform to be less crowded. Significantly, this behaviour means that people  
31 spend more time on the platform and can increase the time for an intervention to occur.  
32  
33  
34  
35  
36  
37

38 Two interview participants mentioned their reasoning for allowing trains to pass by, which  
39 suggests they waited for the platform to be less crowded and/or they were working up the  
40 courage to jump/get onto the tracks:  
41  
42  
43

44  
45 *“But yeah and then I went down to the Underground and didn’t get on a train at all*  
46 *but I did walk between a few of the difficult platforms and lines so yeah I had no*  
47 *intention of getting on a train.” And “Late evening so I’d waited till after rush hour*  
48 *and I’d gone down and I just spent so long trying to find a time when there was*  
49 *definitely no young people, like somehow children I definitely couldn’t do it if there*  
50 *was any kids anywhere. And then all these people going back from work I felt really*  
51 *guilty they were going to be late and they weren’t going to see their families or people*  
52  
53  
54  
55  
56  
57

1  
2  
3 *would be disrupted. It was such a big thing, and then I was trying to wait until it was*  
4 *quiet and there was no-one around.” (Interviewee A6)*  
5

6  
7  
8 *“I kept like waiting for like a platform to be completely empty. Because I didn’t want*  
9 *anyone to see me.” And “Because I couldn’t do... I don’t know what it was. And I*  
10 *remember... I had spent about 15 minutes at X [station]. Maybe a little more. Kind of*  
11 *like willing myself to do it.” (Interviewee A8)*  
12  
13

14  
15  
16 Staff (15%, N=19) also reported that waiting for long periods of time at the platform/station  
17 could be a potential indicator that someone is going to make a suicide attempt.  
18

### 19 20 21 **Repetitive behaviour**

22 Those individuals in the footage that did not jump/get onto the tracks immediately once  
23 entering the station (N=11) carried out a number of repetitive behaviours. Some of these  
24 could be considered ‘normal’ such as pacing/fidgeting, and therefore unlikely to be noticed  
25 by other people as ‘abnormal.’ However, these individuals also carried out several repetitive  
26 behaviours which could be noticeable by station staff or other people if the person was  
27 observed. These behaviours included: station hopping, switching platforms, walking up to the  
28 platform edge then returning to the wall/seating area, walking up and down the platform,  
29 walking up and down stairs/escalators. One interview participant mentioned his repetitive  
30 behaviour being significant:  
31  
32  
33  
34  
35  
36  
37

38 *“I’d gone into town specifically to step in front of a train... I kept going back and*  
39 *forth between like a bench and the edge of the platform.” And “There’s always going*  
40 *to be some kind of warning sign... For example, like, to go with my experience, I was*  
41 *sitting at the point where the trains come in, like, the edge of the tunnel. And I was on*  
42 *that spot for about... upwards of 15 minutes. Like going, sitting on a bench, and then*  
43 *like when I could hear the train coming I would go to the edge of the platform... And*  
44 *then when I couldn’t do it, I’d go back to the bench.” (Interviewee A8)*  
45  
46  
47  
48  
49  
50

51 Ten staff respondents (10%) identified pacing behaviour as being a cause for concern, and  
52 others (13%, N=17) noted that signs of agitation and distress can also be a warning sign.  
53  
54  
55

### 56 **Trying to look normal**

57  
58  
59  
60

1  
2  
3 Two interview participants reported having tried to blend in and ‘look normal’ at the time of  
4 their attempt. This could potentially explain some of the behaviour identified in the CCTV  
5 data, such as people who were looking at their phones and an individual who picked up a  
6 paper and seemed to be reading it just before jumping:  
7  
8

9  
10  
11 *“I was trying to look normal and look like I had some purpose.” (Interviewee A6)*  
12

13  
14 *“I was wearing my earphones... To kind of like... no one’s going to bother me*  
15 *because I’m listening to my music.” (Interview A8)*  
16  
17

18  
19 In contrast, staff felt that individuals who were about to make an attempt would show clear  
20 signs of distress or of “behaving in an odd manner”, even when “being quiet so as to not draw  
21 attention to themselves”. Indeed, a visibly distressed and “unusual” appearance was the  
22 behavioural sign most often identified as concerning by staff participants, including both  
23 those who had direct and indirect experience of working with suicidal individuals (see figures  
24 1 & 2). Many described this as a markedly “withdrawn”, “zoned out” appearance, seemingly  
25 “devoid of emotion” and “disinterested in surroundings”. “Staring at the track” and “staring  
26 into space” were both mentioned under this category, as were “sitting with their heads down”  
27 or “in their hands” and “looking lost”, “in their own world” with “a sunken inward look of  
28 lost hope”. Others discussed having (also) witnessed a more ‘outward’ pattern of “panicked”,  
29 “agitated” and “erratic behaviour”, including “throwing belongings across the station” and  
30 having “incoherent conversations”, and a “dishevelled”, “drunk” appearance.  
31  
32  
33  
34  
35  
36  
37  
38  
39

40 Whilst these responses suggest that individuals may not always seek or succeed to ‘look  
41 normal’ before a suicide attempt, some staff also commented on the difficult task of  
42 identifying potentially suicidal individuals as there are, at times, no warning signs:  
43  
44  
45

46  
47 *“Suicidal people don’t really stand out until they make a move for a jump or go onto the*  
48 *track, suicidal persons come in all shapes and sizes and socioeconomic backgrounds,*  
49 *there is no stereotypical sign attributable”*  
50

51 (Mobile Operations Manager, 6-10 years in job)  
52  
53

54  
55 *“Very rare to find someone as they tend to hide in out the way places. If a cry for help, the*  
56 *person will normally be spotted at the end of a platform or around a public footpath*  
57  
58

1  
2  
3 *crossing, hanging around alone. A very difficult question to answer as it is actually rare*  
4 *to find someone in that state. Those I have encountered have been distressed and just look*  
5 *'alone' with no purpose other than lost in their own thoughts''*

6  
7  
8 (Mobile Operations Manager, 15+ years in job)  
9

10  
11 [Insert figures 1 & 2 about here]  
12  
13

## 14 **Discussion**

15  
16 Previous research has identified behaviours that may precede a rail suicide attempt such as  
17 erratic movements and leaving belongings behind<sup>5, 7</sup>, however much of this research has  
18 focussed on the perspectives of witnesses to these events, whose memories may be subject to  
19 memory bias. The current research has for the first time brought together CCTV data of  
20 people who have died by suicide on the railways, data from individuals who have attempted  
21 suicide by rail and data from frontline staff who deal with suicides at railway/tube locations.  
22  
23  
24  
25

26  
27 Our findings suggest that it can be difficult to detect those who may be about to end their  
28 lives at stations, yet some forms of repetitive behaviour which appear outside of 'normal'  
29 commuting behaviour have the potential to signify that someone may be a risk of suicide.  
30 Five of the 16 individuals whose footage we analysed jumped in front of the first train to  
31 arrive on the platform (though in all cases but one there was a delay between their arrival on  
32 the platform and the first train going past). However, other individuals in the footage showed  
33 distinctive behaviours that would not be normally expected in commuters, such as moving  
34 between platforms, station hopping and waiting at the station for a significant amount of time  
35 whilst allowing trains to pass by. These behaviours were also commented on by those who  
36 had survived a rail attempt and staff. In turn, this has two important implications: 1) station  
37 hopping means that these individuals spend a longer time in the railway/underground system,  
38 therefore increasing the chance of an intervention; 2) platform switching could be a  
39 noticeable behaviour that falls outside of 'normal' commuting behaviour, again increasing the  
40 opportunity for intervention.  
41  
42  
43  
44  
45  
46  
47  
48  
49

50  
51 Together our interview, survey and CCTV data, suggest that a visible presence of staff or  
52 other potential sources of support (including lay volunteers) may reduce the likelihood of an  
53 attempt being made. Additionally, the likelihood of intervention may be even greater if staff,  
54 including those monitoring CCTV, have heightened awareness of the time people spend on  
55  
56  
57  
58  
59

1  
2  
3 platforms, and if staff and other bystanders (including commuters) are aware of how to  
4 potentially spot and assist someone in distress. Staff reports of being approached by suicidal  
5 individuals suggest that having a presence at stations could also encourage suicidal  
6 individuals to seek help. Furthermore, the use of intelligent technology for identifying  
7 behavioural algorithms<sup>14</sup> could be adapted to identify suicidal behaviours - but rigorous  
8 testing would be necessary to ensure that this was neither over sensitive nor under sensitive to  
9 these types of behaviours.  
10  
11  
12  
13  
14

15  
16 **Limitations:** The current research must be considered within its limitations. It is important  
17 to note that the CCTV included is a small sample of station incidents chosen by BTP, which  
18 will not necessarily reflect every person's behaviour in this situation, and may not be  
19 generalisable to behaviour in other railway locations such as tracks, bridges, or level  
20 crossings. A more in-depth analysis of CCTV footage would need to be carried out, ideally  
21 with a focus on locations that are known to be 'high-risk'. In addition, the clips we analysed  
22 are limited to footage of those who died by suicide. Analysing footage of 'life-saving  
23 interventions' by a member of the public (potentially in comparison to CCTV data of both  
24 suicide/attempted suicide and of 'normal'/incident-free platform behaviour) may provide  
25 important learning on the role of bystanders - and potential bystander interventions - in rail  
26 suicide prevention.  
27  
28  
29  
30  
31  
32  
33  
34

35 The staff survey and interview study were also based on small samples, and as such not  
36 generalisable. In addition, both are subject to the potential biases and other methodological  
37 limitations common to self-report data. Nonetheless, there are some distinct similarities, and  
38 'triangulation', in the findings of the three studies reported, which strengthen their  
39 conclusions.  
40  
41  
42  
43  
44

45 **Conclusion:** Identification of behaviour that precedes a rail suicide or suicide attempt can be  
46 difficult, but potentially very useful to inform suicide prevention efforts in these settings.  
47 Using a multi-methodological approach, we identified a range of behaviours and other  
48 potential warning signs immediately preceding suicidal behaviour on the rails. This includes  
49 behaviours which could be easily dismissed as 'normal' commuting behaviour (such as  
50 pacing up and down a station platform or fidgeting), but also behaviours such as station  
51 hopping, platform switching, and spending a long time at specific locations which arguably  
52 fall outside of 'normal' commuting behaviour. Our findings, although based on small  
53  
54  
55  
56  
57  
58  
59  
60



1  
2  
3 samples, suggest that these behaviours are largely repetitive and could present important  
4 opportunities for identification and intervention. The findings from this research (and from  
5 the *Quest study*) have been used in the development of a national campaign by the railways  
6 called 'small talk saves lives.' The campaign aims to encourage commuters to engage in  
7 conversation with people who appear visibly distressed at railway locations, in order to  
8 interrupt the suicidal thought process, and ultimately prevent suicides.  
9  
10  
11  
12  
13  
14  
15  
16  
17  
18  
19  
20  
21  
22  
23  
24  
25  
26  
27  
28  
29  
30  
31  
32  
33  
34  
35  
36  
37  
38  
39  
40  
41  
42  
43  
44  
45  
46  
47  
48  
49  
50  
51  
52  
53  
54  
55  
56  
57  
58  
59  
60

For peer review only

## References

1. Rail Safety and Standards Board. Improving suicide prevention measures on the rail network in Great Britain. 2014.
2. Office of Rail and Road. Rail Safety Statistics, 2015-16 Annual Statistical Release. Office of National Statistics. 2016.
3. Rail Safety and Standards Board. Annual Safety Performance Report 2015/16, A reference guide to safety trends on GB railways. 2016.
4. Network Rail. Suicide Prevention on the Railway. 2016.
5. Mishara BL, Bardon C. Systematic review of research on railway and urban transit system suicides. *Journal of affective disorders*. 2016;193:215-26.
6. Runeson BS, Beskow J, Waern M. The suicidal process in suicides among young people. *Acta Psychiatrica Scandinavica*. 1996;93(1):35-42.
7. Lukaschek K, Baumert J, Ladwig K-H. Behaviour patterns preceding a railway suicide: Explorative study of German Federal Police officers' experiences. *BMC public health*. 2011;11(1):620.
8. Rådbo H, Svedung I, Andersson R. Suicides and other fatalities from train-person collisions on Swedish railroads: A descriptive epidemiologic analysis as a basis for systems-oriented prevention. *Journal of Safety Research*. 2005;36(5):423-8.
9. Dinkel A, Baumert J, Erazo N, Ladwig K-H. Jumping, lying, wandering: Analysis of suicidal behaviour patterns in 1,004 suicidal acts on the German railway net. *Journal of Psychiatric Research*. 2011;45(1):121-5.
10. Heath C, Hindmarsh J, Luff P. Video in qualitative research: *Sage Publications*; 2010.
11. Braun V, Clarke V. Using thematic analysis in psychology. *Qualitative Research in Psychology*. 2006;3(2):77-101.
12. Braun V, Clarke V. Successful qualitative research: A practical guide for beginners. Hampshire: Sage; 2013.
13. Thorne S. Data analysis in qualitative research. *Evidence-based nursing*. 2000;3(3):68-70.
14. Wang X. Intelligent multi-camera video surveillance: A review. *Pattern recognition letters*. 2013;34(1):3-19.

- **Contributors** Study design was carried out by all authors. Recruitment for interviews was carried out by JB, BF, IK, JM and LM (i.e. via an online survey). Recruitment for the staff survey was carried out by EH and IN. JM and JB conducted and analysed the interviews. JM analysed the CCTV data, which was checked and second coded by JB. Staff survey data was collected and analysed by EH and checked for consistency by IN. The article was written by JM with contributions from all other authors.
- **Funding** This study was commissioned by the Samaritans and funded by Network Rail.
- **Competing interests** None declared.
- **Ethics approval** The Research Ethics Committees at Middlesex, Westminster and King's College London Universities granted ethical approval for this research.
- **Data sharing statement** Our results section of this manuscript provides illustrative examples of our data which have anonymised. Due to the qualitative nature of this study we cannot make full transcripts, footage or survey data available as these could potential identify our participants.

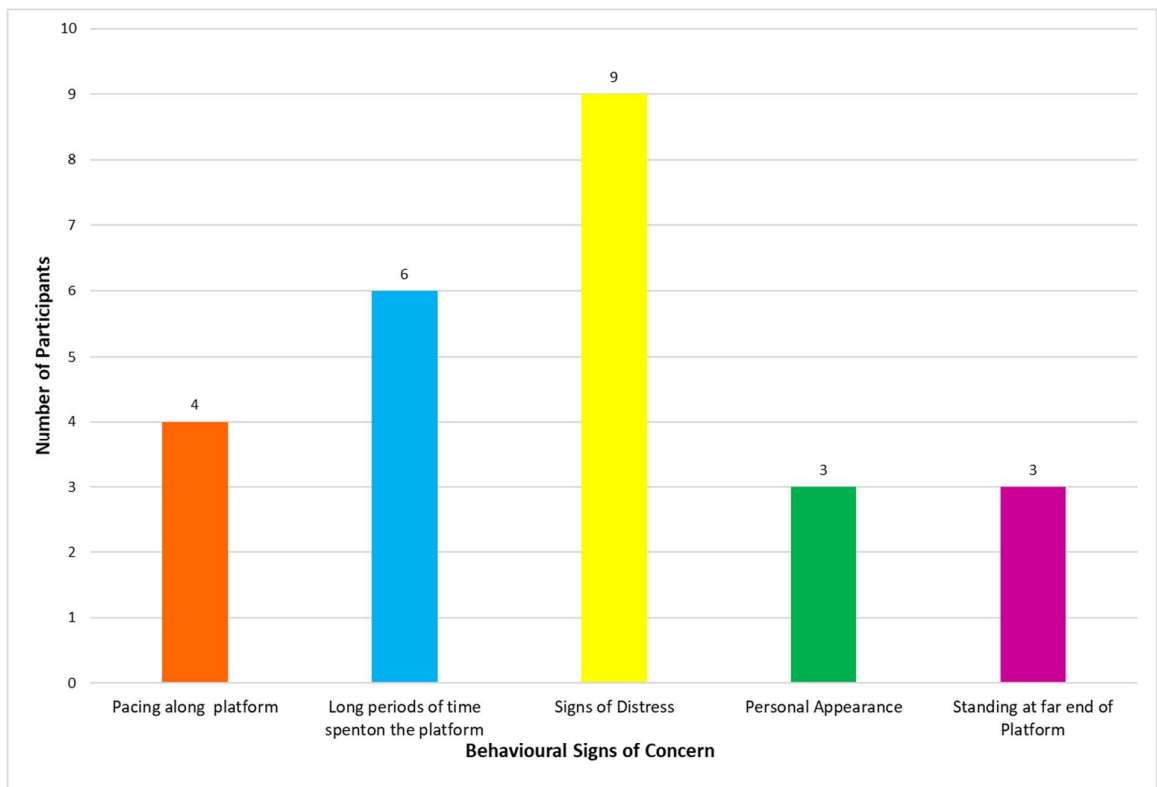

**Figure 1: Behaviours and warning signs identified by staff with direct experience of rail suicide prior to an incident**

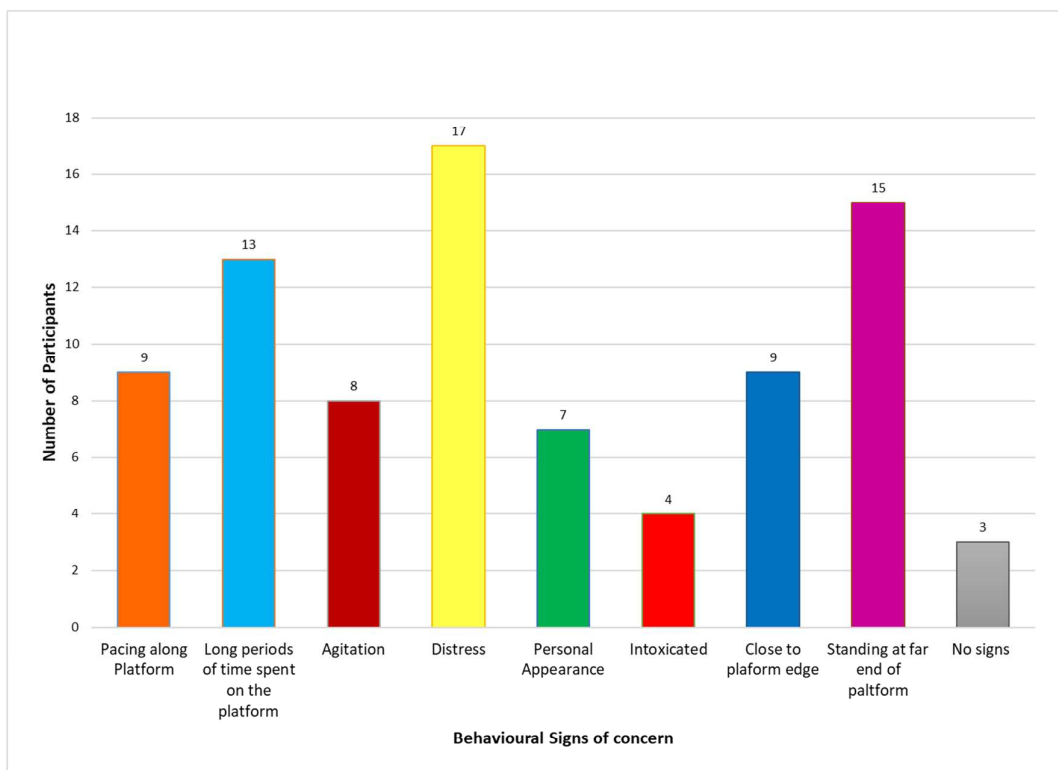

**Figure 2: Behavioural antecedents and warning signs identified by staff with indirect experience of railway suicide**

Review only

1  
2  
3  
4  
5  
6  
7  
8  
9  
10  
11  
12  
13  
14  
15  
16  
17  
18  
19  
20  
21  
22  
23  
24  
25  
26  
27  
28  
29  
30  
31  
32  
33  
34  
35  
36  
37  
38  
39  
40  
41  
42  
43  
44  
45  
46  
47  
48  
49  
50  
51  
52  
53  
54  
55  
56  
57  
58  
59  
60

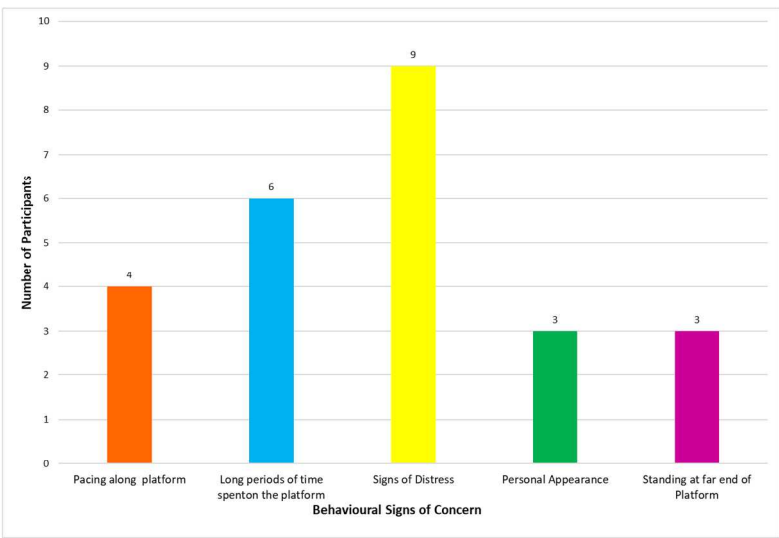

Figure 1: Behaviours and warning signs identified by staff with direct experience of rail suicide prior to an incident

338x190mm (300 x 300 DPI)

Review only

1  
2  
3  
4  
5  
6  
7  
8  
9  
10  
11  
12  
13  
14  
15  
16  
17  
18  
19  
20  
21  
22  
23  
24  
25  
26  
27  
28  
29  
30  
31  
32  
33  
34  
35  
36  
37  
38  
39  
40  
41  
42  
43  
44  
45  
46  
47  
48  
49  
50  
51  
52  
53  
54  
55  
56  
57  
58  
59  
60

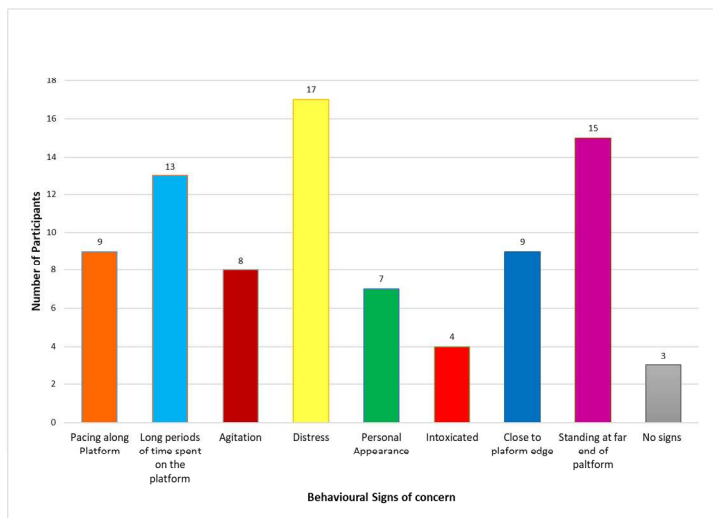

Figure 2: Behavioural antecedents and warning signs identified by staff with indirect experience of railway suicide

338x190mm (300 x 300 DPI)

Review only

## Standards for Reporting Qualitative Research (SRQR)\*

<http://www.equator-network.org/reporting-guidelines/srqr/>

Page/line no(s).

### Title and abstract

|                                                                                                                                                                                                                                                              |      |
|--------------------------------------------------------------------------------------------------------------------------------------------------------------------------------------------------------------------------------------------------------------|------|
| <p><b>Title</b> - Concise description of the nature and topic of the study Identifying the study as qualitative or indicating the approach (e.g., ethnography, grounded theory) or data collection methods (e.g., interview, focus group) is recommended</p> | Pg 1 |
| <p><b>Abstract</b> - Summary of key elements of the study using the abstract format of the intended publication; typically includes background, purpose, methods, results, and conclusions</p>                                                               | Pg 2 |

### Introduction

|                                                                                                                                                                     |                |
|---------------------------------------------------------------------------------------------------------------------------------------------------------------------|----------------|
| <p><b>Problem formulation</b> - Description and significance of the problem/phenomenon studied; review of relevant theory and empirical work; problem statement</p> | Pg 3-4, 68-108 |
| <p><b>Purpose or research question</b> - Purpose of the study and specific objectives or questions</p>                                                              | P4, 116-117    |

### Methods

|                                                                                                                                                                                                                                                                                                                                                                                                             |                                                     |
|-------------------------------------------------------------------------------------------------------------------------------------------------------------------------------------------------------------------------------------------------------------------------------------------------------------------------------------------------------------------------------------------------------------|-----------------------------------------------------|
| <p><b>Qualitative approach and research paradigm</b> - Qualitative approach (e.g., ethnography, grounded theory, case study, phenomenology, narrative research) and guiding theory if appropriate; identifying the research paradigm (e.g., postpositivist, constructivist/ interpretivist) is also recommended; rationale**</p>                                                                            | P4, 131-137, Pg5, 154-161, Pg6, 185-193             |
| <p><b>Researcher characteristics and reflexivity</b> - Researchers' characteristics that may influence the research, including personal attributes, qualifications/experience, relationship with participants, assumptions, and/or presuppositions; potential or actual interaction between researchers' characteristics and the research questions, approach, methods, results, and/or transferability</p> | Pg 1, 1-2, Pg 4, 135-138 Pg 6, 159-161 Pg7, 191-193 |
| <p><b>Context</b> - Setting/site and salient contextual factors; rationale**</p>                                                                                                                                                                                                                                                                                                                            | Pg4-5, 125-130 Pg6, 147-150 Pg6, 170-177            |
| <p><b>Sampling strategy</b> - How and why research participants, documents, or events were selected; criteria for deciding when no further sampling was necessary (e.g., sampling saturation); rationale**</p>                                                                                                                                                                                              | Pg4, 125-130 Pg5, 142-147 Pg5, 171-184              |
| <p><b>Ethical issues pertaining to human subjects</b> - Documentation of approval by an appropriate ethics review board and participant consent, or explanation for lack thereof; other confidentiality and data security issues</p>                                                                                                                                                                        | Pg 17, 499-500                                      |
| <p><b>Data collection methods</b> - Types of data collected; details of data collection procedures including (as appropriate) start and stop dates of data collection and analysis, iterative process, triangulation of sources/methods, and modification of procedures in response to evolving study findings; rationale**</p>                                                                             | Pg4, 125-130 Pg5, 142-147 Pg5, 171-184              |

|    |                                                                                         |               |
|----|-----------------------------------------------------------------------------------------|---------------|
| 1  |                                                                                         |               |
| 2  | <b>Data collection instruments and technologies</b> - Description of instruments (e.g., | Pg4, 125-130  |
| 3  | interview guides, questionnaires) and devices (e.g., audio recorders) used for data     | Pg5, 142-153  |
| 4  | collection; if/how the instrument(s) changed over the course of the study               | Pg5, 163-175  |
| 5  |                                                                                         |               |
| 6  | <b>Units of study</b> - Number and relevant characteristics of participants, documents, | Pg4, 125-130  |
| 7  | or events included in the study; level of participation (could be reported in results)  | Pg5, 142-153  |
| 8  |                                                                                         | Pg5, 163-175  |
| 9  | <b>Data processing</b> - Methods for processing data prior to and during analysis,      | P4, 131-137,  |
| 10 | including transcription, data entry, data management and security, verification of      | Pg5, 154-161, |
| 11 | data integrity, data coding, and anonymization/de-identification of excerpts            | Pg6, 185-193  |
| 12 |                                                                                         |               |
| 13 | <b>Data analysis</b> - Process by which inferences, themes, etc., were identified and   | P4, 131-137,  |
| 14 | developed, including the researchers involved in data analysis; usually references a    | Pg5, 154-161, |
| 15 | specific paradigm or approach; rationale**                                              | Pg6, 185-193  |
| 16 |                                                                                         |               |
| 17 | <b>Techniques to enhance trustworthiness</b> - Techniques to enhance trustworthiness    | Pg5, 135-138  |
| 18 | and credibility of data analysis (e.g., member checking, audit trail, triangulation);   | Pg6, 160-161  |
| 19 | rationale**                                                                             | Pg7, 191-193  |
| 20 |                                                                                         |               |

## Results/findings

|    |                                                                                             |                 |
|----|---------------------------------------------------------------------------------------------|-----------------|
| 21 |                                                                                             |                 |
| 22 |                                                                                             |                 |
| 23 | <b>Synthesis and interpretation</b> - Main findings (e.g., interpretations, inferences, and |                 |
| 24 | themes); might include development of a theory or model, or integration with                |                 |
| 25 | prior research or theory                                                                    | Pg7-13, 195-382 |
| 26 |                                                                                             |                 |
| 27 | <b>Links to empirical data</b> - Evidence (e.g., quotes, field notes, text excerpts,        |                 |
| 28 | photographs) to substantiate analytic findings                                              | Pg7-13, 195-382 |
| 29 |                                                                                             |                 |

## Discussion

|    |                                                                                           |               |
|----|-------------------------------------------------------------------------------------------|---------------|
| 30 |                                                                                           |               |
| 31 |                                                                                           |               |
| 32 | <b>Integration with prior work, implications, transferability, and contribution(s) to</b> |               |
| 33 | <b>the field</b> - Short summary of main findings; explanation of how findings and        |               |
| 34 | conclusions connect to, support, elaborate on, or challenge conclusions of earlier        | Pg13-15, 384- |
| 35 | scholarship; discussion of scope of application/generalizability; identification of       | 447           |
| 36 | unique contribution(s) to scholarship in a discipline or field                            |               |
| 37 |                                                                                           |               |
| 38 | <b>Limitations</b> - Trustworthiness and limitations of findings                          | Pg14, 418-432 |
| 39 |                                                                                           |               |

## Other

|    |                                                                                            |            |
|----|--------------------------------------------------------------------------------------------|------------|
| 40 |                                                                                            |            |
| 41 |                                                                                            |            |
| 42 | <b>Conflicts of interest</b> - Potential sources of influence or perceived influence on    |            |
| 43 | study conduct and conclusions; how these were managed                                      | Pg17, 498  |
| 44 |                                                                                            |            |
| 45 | <b>Funding</b> - Sources of funding and other support; role of funders in data collection, |            |
| 46 | interpretation, and reporting                                                              | Pg 17, 497 |
| 47 |                                                                                            |            |

\*The authors created the SRQR by searching the literature to identify guidelines, reporting standards, and critical appraisal criteria for qualitative research; reviewing the reference lists of retrieved sources; and contacting experts to gain feedback. The SRQR aims to improve the transparency of all aspects of qualitative research by providing clear standards for reporting qualitative research.



1  
2  
3  
4  
5  
6  
7  
8  
9  
10  
11  
12  
13  
14  
15  
16  
17  
18  
19  
20  
21  
22  
23  
24  
25  
26  
27  
28  
29  
30  
31  
32  
33  
34  
35  
36  
37  
38  
39  
40  
41  
42  
43  
44  
45  
46  
47  
48  
49  
50  
51  
52  
53  
54  
55  
56  
57  
58  
59  
60

\*\*The rationale should briefly discuss the justification for choosing that theory, approach, method, or technique rather than other options available, the assumptions and limitations implicit in those choices, and how those choices influence study conclusions and transferability. As appropriate, the rationale for several items might be discussed together.

**Reference:**

O'Brien BC, Harris IB, Beckman TJ, Reed DA, Cook DA. **Standards for reporting qualitative research: a synthesis of recommendations.** *Academic Medicine*, Vol. 89, No. 9 / Sept 2014  
DOI: 10.1097/ACM.0000000000000388

For peer review only

# BMJ Open

## Behaviours preceding suicides at railway and underground locations: A multi-methodological qualitative approach.

|                                 |                                                                                                                                                                                                                                                                                                                                                                                                                                                   |
|---------------------------------|---------------------------------------------------------------------------------------------------------------------------------------------------------------------------------------------------------------------------------------------------------------------------------------------------------------------------------------------------------------------------------------------------------------------------------------------------|
| Journal:                        | <i>BMJ Open</i>                                                                                                                                                                                                                                                                                                                                                                                                                                   |
| Manuscript ID                   | bmjopen-2017-021076.R1                                                                                                                                                                                                                                                                                                                                                                                                                            |
| Article Type:                   | Research                                                                                                                                                                                                                                                                                                                                                                                                                                          |
| Date Submitted by the Author:   | 01-Feb-2018                                                                                                                                                                                                                                                                                                                                                                                                                                       |
| Complete List of Authors:       | Mackenzie, Jay-marie; University of Westminster, Psychology<br>Borrill, Jo; University of Westminster, Psychology<br>Hawkins, Emily; King's College London School of Medical Education, Mental Health<br>Fields, Bob; Middlesex University, Computer Science<br>Kruger, Ian; Middlesex University, Psychology<br>Noonan, Ian; King's College London School of Medical Education, Mental Health<br>Marzano, Lisa; Middlesex University, Psychology |
| <b>Primary Subject Heading</b>: | Mental health                                                                                                                                                                                                                                                                                                                                                                                                                                     |
| Secondary Subject Heading:      | Qualitative research                                                                                                                                                                                                                                                                                                                                                                                                                              |
| Keywords:                       | Suicide & self-harm < PSYCHIATRY, MENTAL HEALTH, QUALITATIVE RESEARCH, PUBLIC HEALTH                                                                                                                                                                                                                                                                                                                                                              |
|                                 |                                                                                                                                                                                                                                                                                                                                                                                                                                                   |

SCHOLARONE™  
Manuscripts

only

1  
2  
3 **Behaviours preceding suicides at railway and underground locations: A multi-**  
4 **methodological qualitative approach.**  
5  
6  
7  
8  
9

10  
11 Dr Jay-Marie, Mackenzie, PhD, Department of Psychology, University of Westminster, 115  
12 New Cavendish Street, London, W1W 6UW, Telephone 020 7911 5000,  
13 J.C.Mackenzie@westminster.ac.uk  
14

15 Dr Jo Borrill, PhD, Department of Psychology, University of Westminster London

16 Emily Hawkins, MSc, Department of Mental Health, Kings College London

17  
18 Dr Bob Fields, PhD, Department of Computer Science, University of Middlesex London

19 Ian Kruger, MSc, Department of Psychology, University of Middlesex London

20 Ian Noonan, MSc, Department of Mental Health, Kings College London

21  
22 Dr Lisa Marzano, PhD, Department of Psychology, University of Middlesex London  
23  
24  
25

26 **Key words:** Suicide and self-harm, Mental Health, Qualitative Research, Public Health  
27  
28  
29

30 Word count 4456  
31  
32  
33  
34  
35  
36  
37  
38  
39  
40  
41  
42  
43  
44  
45  
46  
47  
48  
49  
50  
51  
52  
53  
54  
55  
56  
57  
58  
59  
60

## Abstract

**Objectives:** Suicides by train have devastating consequences for families, the rail industry, staff dealing with the aftermath of such incidents, and potential witnesses. To reduce suicides and suicide attempts by rail it is important to learn how safe interventions can be made. However, very little is known about how to identify someone who may be about to make a suicide attempt at a railway location (including underground/subways). The current research employed a novel way of understanding what behaviours might immediately precede a suicide or suicide attempt at these locations.

**Design and Methods:** A qualitative thematic approach was used for three parallel studies. Data were gathered from several sources including: interviews with individuals who survived a rail suicide attempt (N=9); CCTV footage of individuals who died by rail suicide (N=16); and qualitative survey data providing views from rail staff (N=79).

**Results:** Our research suggests there are several behaviours that people may carry out before a suicide or suicide attempt at a rail location including: station hopping and platform switching; limiting contact with others; positioning themselves at the end of the track where the train/tube approaches; allowing trains to pass by; and carrying out repetitive behaviours.

**Conclusions:** There are several behaviours that may be identifiable in the moments leading up to a suicide or suicide attempt on the railways, which may present opportunities for intervention. These findings have implications for several stakeholders including rail providers, transport police and other organisations focused on suicide prevention.

## Strengths and limitations

- By mapping together three data sources this study took a novel approach to understanding what behaviours might precede a suicide or suicide attempt at a railway location, thus resultingly provides a more complete picture of what behaviours might precede a suicide or suicide attempt at a railway/subway location.
- There are some distinct similarities, and ‘triangulation’, in the findings of the three studies reported, which strengthen their conclusions.
- Due to difficulties with accessing this type of data our sample sizes are limited, therefore findings are unlikely to be generalisable across all railway and underground locations.

## Introduction

Suicides on the railway and underground network in the United Kingdom (UK) are of great concern to the railway industry, putting a financial strain on the service, as well as emotional strain on their staff, including British Transport Police (BTP) Officers<sup>1</sup>. Between 2015-2016 278 people died by suicide or suspected suicide on UK railways and undergrounds<sup>2</sup>, with over 1100 interventions taking place to prevent a suicide<sup>3</sup>. The UK rail industry have their own suicide prevention strategy, and work closely with organisations such as the Samaritans<sup>1</sup> and BTP to understand and prevent suicides<sup>4</sup>. Researchers have tried to understand who might be at risk of suicide on the railways, and what environmental factors might play a role in suicides on the railways. Being male, living close to a railway, and having a diagnosed psychiatric illness, have all been established to increase the risk<sup>5</sup>. The time of year and time of day has also been linked to suicide risk<sup>5</sup>.

Individuals' behaviours immediately preceding a suicide attempt are a crucial element of the suicidal process, i.e. the multidimensional sequence of events by which suicidal ideas become plans, and plans are then acted upon<sup>6</sup>. Understanding behaviour before an attempt on the railways is thus a key aspect of understanding why and how individuals attempt suicide using this method. Yet there is very little research into this<sup>5</sup>, and existing research tends to focus on the perspectives of witnesses and staff present at the time of the suicide. For example, research that has gathered the views of police officers suggests that behaviours associated with subsequent suicide attempts include: leaving behind belongings; avoiding eye contact; erratic movements; erratic communication and confusion. Other behaviours include: being under the influence of alcohol; wandering around; and unusual clothing<sup>7</sup>. This type of research tells us about some of the potential behaviour that may precede a railway suicide, however it relies on interpretation by a third party and may be subject to memory bias. In this context, the accounts of individuals who have survived an attempt on the rails can offer some important insights, and help triangulate the findings of research focusing on staff/witnesses, but are also subject to poor recall.

Structured analyses of Close Circuit Television (CCTV) data can usefully complement witness and survivor accounts of the events, decisions and behaviours leading up to a suicidal attempt on the rails, particularly the moments immediately preceding the act. In addition, this

---

<sup>1</sup> A UK based suicide prevention charity.

1  
2  
3 method may lead to identifying discernible circumstances and patterns of behaviour in the  
4 lead up to an incident which may assist staff in preventing suicide on the railways. This  
5 information could feed directly into staff training and inform new initiatives to reduce suicide  
6 on the railways, including computer software capable of detecting 'high risk' behaviour from  
7 live CCTV data. However, there have been few previous attempts to use rail suicide CCTV  
8 data for these purposes<sup>5, 8</sup>, and their primary focus has been limited to identifying how  
9 suicidal individuals position themselves on the tracks<sup>9, 10</sup>. Only one publication that focused  
10 on Canadian railway locations has used CCTV data to establish possible identifiable  
11 behaviour in the moments preceding a suicide<sup>8</sup>. There are no publications which incorporate  
12 an analysis of CCTV data of people who have died by rail suicide with first-hand accounts of  
13 suicidal behaviour at railway locations, from the perspectives of those who have survived and/or  
14 witnessed such behaviour at railway locations.

15  
16 The aim of the current study was to identify behaviours that may precede a suicide or suicide  
17 attempt on the railway or underground using multiple data sources: CCTV footage of rail  
18 suicides; interviews with individuals who have attempted suicide on the railway; and  
19 accounts from staff working in railway settings.

## 30 31 **Methods**

### 32 33 **Design**

34  
35 Three parallel studies were carried out to understand what behaviours may precede a suicide  
36 or suicide attempt, using multiple perspectives (i.e. CCTV, interviews with survivors and  
37 comments from staff working in rail locations). This work forms part of a wider study into  
38 why people choose to end their lives on the railways (See: *The QUEST study*,  
39 <http://questcoding.wikispaces.com/>). Railways included both rail and underground networks  
40 across the UK. This study was approved by the research Ethics Committees at Middlesex,  
41 Westminster and King's College London Universities granted ethical approval for this  
42 research. Written informed consent was provided by all participants for both the survey study  
43 and interviews. Consent for CCTV analysis was gained through BTP.

44  
45  
46  
47  
48  
49  
50  
51 **CCTV study:** We carried out a structured analysis of CCTV data of individuals (13 males and  
52 3 females) who took their life on the rails in 2013. BTP provided 16 clips of fatal attempts at  
53 railway stations (N=3) and underground stations (N=13). In relation to each incident, the  
54  
55  
56  
57  
58  
59  
60

footage includes all or edited<sup>2</sup> CCTV data - from the moment the person came to the train or tube station (or when they first appear on CCTV) up to the moment of death (this ranged between two minutes and 12 hours, with the average footage lasting 30 minutes).

*Analysis:* Analysis of these CCTV data involved coding and making detailed notes for every two-minute segments of footage<sup>11</sup>. The initial coding scheme was developed using an iterative coding process, based on emerging interview and survey findings, and existing evidence; and was refined as the study progressed. Our aim was to analyse people's behaviour before taking their lives on the railways. To ensure inter-observer reliability the initial coding was conducted by one author (JM) and checked for consistency by a second author (JB), both are experienced qualitative researchers who specialise in suicide. The final coding scheme was agreed by three authors (JM, LM, JB) (See Table 1).

**Table 1: CCTV coding scheme**

| Code number | Code                                                                    |
|-------------|-------------------------------------------------------------------------|
| Code 1      | <i>Position of the person on the platform</i>                           |
| Code 2      | <i>Were other people/potential bystanders present?</i>                  |
| Code 3      | <i>Did the person interact with others?</i>                             |
| Code 4      | <i>Behaviour/body language</i>                                          |
| Code 5      | <i>How many trains went by in both directions before each incident?</i> |
| Code 6      | <i>Comparison with other passengers' behaviour</i>                      |
| Code 7      | <i>Do other passengers appear to notice anything suspicious?</i>        |

<sup>2</sup> Some data were shortened by BTP if the footage was over 1 hour. Where station hopping occurred, clips from stations were added together. No footage of individuals actually travelling on the railways/tubes was available.

1  
2  
3 **Interviews:** Interviews were carried out as part of a wider study into why people consider or  
4 attempt to end their lives on the railways (*The QUEST study*). Participants for the current  
5 research included nine UK nationals (six males and three females) who spoke about their  
6 behaviour preceding a suicide attempt at a railway or underground location. Participants'  
7 ages ranged from 18 to 72 years, with most describing themselves as white British and one  
8 British Indian. Participants were recruited through an online survey and through the BTP.  
9 Depending on preference and location of the participant, interviews were conducted either  
10 face-to-face in University premises or in a private room at a local Samaritans' branch, or over  
11 the telephone. Interviews were conducted by JM or JB.  
12  
13

14  
15  
16  
17  
18 A semi-structured interview schedule was used to explore participants' experiences of  
19 attempting suicide on the railways, and for the current study focus was given to behaviours  
20 immediately preceding an attempt/planned attempt when at a station.  
21  
22

23  
24 **Analysis:** Interviews were audio recorded, transcribed verbatim, and then analysed for both  
25 semantic and latent themes using an inductive thematic approach<sup>12, 13</sup>. Identifiable  
26 information was removed to ensure participant anonymity. Transcripts were read at least  
27 twice, summarised, and major themes recorded. Data coding was iterative: a coding frame  
28 was developed based on analysis of the first interview transcript, and then refined based on  
29 subsequent transcripts, until themes were finalised. NVivo 10 was used in the final stages of  
30 coding to assist with this process. Coding and final themes were checked for consistency by  
31 two authors (JB and JM). No participants were previously known to either of the coders.  
32  
33  
34  
35  
36  
37  
38

39 **Online Staff Survey:** The aim of this survey was to gain a better understanding of railway  
40 suicidal behaviour from a front-line perspective, using both structured and open-ended  
41 questions. The 39-item survey (see supplementary file for staff survey questionnaire items)  
42 covered several key areas, including: demographics, relevant training, views and experiences  
43 of suicidal behaviour on the railways, and suggestions for prevention. The current research  
44 focussed on drawing out what behaviours staff reported as potentially preceding a suicide or  
45 suicide attempt on the rails.  
46  
47  
48  
49  
50

51  
52 The survey was piloted with a small number of Network Rail staff, after which purposive  
53 sampling was used to recruit respondents via the railways intranet. A link to the questionnaire  
54 was sent, along with a briefing document, to specific points of contact within the rail industry  
55  
56  
57  
58  
59  
60



1  
2  
3 through the suicide prevention duty holders group, who then shared the link with their  
4 respective organisations. The target population included employees in all roles, in all railway  
5 environments across the country, including transport police. No employees were excluded  
6 from the study but briefings focused on front line operational staff as they are more often  
7 involved either directly or indirectly with suicide incidents.  
8  
9

10  
11 Responses were received from 140 (103 males, 35 females, 2 unknown) staff aged 18-64  
12 years, from a wide range of disciplines within the railway industry, with experience ranging  
13 from 2-39 years. A total of 79 participants responded within the three-month time frame set  
14 for data collection and were therefore included in the full analysis of the study. The additional  
15 61 responses received outside of the data collection period were scanned for additional  
16 themes but were suggestive of data saturation and therefore the full analysis focussed on the  
17 initial 79 responses. Of these 26 had direct experience of dealing with suicidal behaviour  
18 (including fatal attempts) on the rails.  
19  
20

21  
22 *Analysis:* A qualitative design was used to collect complex textual descriptions and allow for  
23 explanations of the themes found in the data to support the discovery of ‘norms’<sup>14</sup> that seek to  
24 understand how railway employees experience railway suicides. Responses were analysed  
25 thematically<sup>12</sup> with a focus on semantic codes. Both open and axial coding techniques were  
26 used. The content and context of the text were analysed and the identified codes were collated  
27 into themes. These themes were reviewed, integrated where necessary and refined to produce  
28 clear definitions on which to base the final themes<sup>12</sup>. All coding was carried out by one  
29 author (EH) and checked for consistency by a second author (IN) who is experienced in  
30 qualitative research. No participants were previously known to the coders.  
31  
32  
33  
34  
35  
36  
37  
38  
39

## 40 **Results**

41  
42 Five main themes were derived from the analysis of CCTV footage: ‘station hopping and  
43 platform switching’, ‘limited contact with people’, ‘allowing train to pass by’, ‘position when  
44 jumping/getting onto the tracks’, and ‘repetitive behaviours’. Each is discussed below with  
45 comments from participants who survived a suicide attempt on the railways, and from staff  
46 who completed the online survey. A sixth theme, ‘trying to look normal’, emerged from the  
47 interview data and is discussed with reference to the CCTV analysis and staff comments.  
48  
49  
50  
51  
52

### 53 **Station hopping and platform switching**

54  
55  
56  
57  
58  
59  
60

1  
2  
3 Five of the sixteen clips we analysed (two clips did not provide sufficient footage) showed  
4 people who travelled between two or more stations before their suicide. An additional two  
5 clips showed individuals leaving the station building and then returning to the same station.  
6 Some individuals (N=3) moved between platforms at the same location. Several reasons  
7 could explain this behaviour, including that these individuals might be looking for a quiet  
8 location, going to a specific location, or preparing themselves mentally to end their lives. It is  
9 difficult to fully understand the state of mind of individuals who move between platforms  
10 and/or stations, however two interview participants mentioned their reasoning/thoughts when  
11 carrying out these behaviours:  
12  
13  
14  
15  
16

17  
18  
19 *“I walked for a while and I walked around X [station] first because I’d wondered*  
20 *about jumping there and then I ended up at Y [nearby station], I don’t know why, I*  
21 *just did. But a few hours of trying to think and not being able to think, wandering*  
22 *round stations, on and off platforms, in between barriers, just really quite stressed*  
23 *and confused.” (Interviewee A6)*  
24  
25  
26

27  
28  
29 *“And then I was... I got worried that they might be watching on CCTV... So I got on a*  
30 *train and I got off at X [station] ... And then I repeated the process there.”*  
31 *(Interviewee A8)*  
32  
33  
34

35 There was no mention of station hopping or platform switching in the staff survey data,  
36 indicating that respondents may not have been aware that this behaviour can potentially  
37 precede a suicide or suicide attempt.  
38  
39  
40  
41

### 42 **Limited contact with people**

43  
44 The majority of individuals in the CCTV footage positioned themselves away from others.  
45 Only one clip showed an individual interacting with a member of the public, having  
46 instigated contact with another passenger. Most individuals in the clips looked down at the  
47 ground and away from other people. Eleven clips showed that other people were present  
48 when the person jumped/got on the tracks. One clip showed no one else being present, and  
49 three clips did not provide enough visibility to judge.  
50  
51  
52  
53  
54  
55  
56  
57  
58  
59  
60

1  
2  
3 Two interview participants mentioned trying to avoid being seen by other people when they  
4 were about to attempt suicide to avoid an intervention:  
5  
6

7  
8 *“I didn’t want other people around to see and I thought there was no-one else on the*  
9 *platform but someone came through.” And “... timing of the day. I’d looked around,*  
10 *I’d looked up the escalators, I’d looked in the corridor, I hadn’t been able to see*  
11 *anyone – I don’t know where they came from, I didn’t see them on the platform – but*  
12 *I’d looked around, I’d waited, I’d left the platform when there were people there, I’d*  
13 *come back. I thought I’d looked to see if there was CCTV as well and I hadn’t seen*  
14 *any so yeah.” (Interviewee A6)*  
15  
16  
17  
18

19  
20  
21 *“I was like waiting for like people to be off the platform before I did anything. And I*  
22 *was also kind of worried that people like who saw me were like, “He looks a bit*  
23 *weird”, so I’m going to stay down here. So there was no one near me.” (Interviewee*  
24 *A8)*  
25  
26  
27

28  
29 In contrast, findings from the staff survey indicate that some people may approach staff.  
30 Staff were asked if they had ever spoken to a suicidal person on or near a station. All but one  
31 of the 79 participants responded: 67% (N=52) had indirect experience of dealing with suicide  
32 on the rails and 33% (N=26) reported having had direct contact with a suicidal person, in  
33 some cases having been approached by a suicidal individual:  
34  
35  
36  
37

38  
39 *“Many have approached me. They have told me they don’t feel right or that they are*  
40 *feeling like they want to do something stupid, or just they want to kill themselves”*  
41  
42 (BT Police Officer, 11-15 years in job)  
43  
44

### 45 **Position when jumping/getting onto tracks**

46 In the 16 clips we analysed, 14 people jumped/got onto the tracks at the end of the platform  
47 where the train approaches. Two individuals jumped/got onto the tracks at the non-  
48 approaching end. No individuals jumped/got onto the tracks from the middle of the platform.  
49 Several people positioned themselves at the approaching end of the platform very close to  
50 barriers and waited for the train to arrive, whereas some individuals moved back and forth  
51 along the platform, moving to the approaching end when the train arrived.  
52  
53  
54  
55  
56  
57  
58  
59  
60

1  
2  
3 Three interview participants mentioned their position on the platform. These participants  
4 reported that they had chosen a particular station/tube station because they could get close to  
5 the approaching end and near to the ‘tunnel’ opening. One participant felt that getting close to  
6 the tunnel would reduce the likelihood that the driver would spot him (and brake):  
7  
8

9  
10  
11 *“...There’s a way back down towards the tunnel, and I assumed that would be an*  
12 *easier place to jump across without the train driver seeing me.” (Interviewee A5)*  
13

14  
15  
16 *“It was one of those platforms that goes right up to the tunnel – I’d chosen it*  
17 *specifically for that reason.” (Interviewee A6)*  
18

19  
20  
21 Staff (14%, N=18) also identified individuals being positioned towards the approaching end  
22 of the tunnel as a warning sign (see figures 1 & 2). Twelve staff respondents also mentioned  
23 that individuals would stand close to the platform edge:  
24

25  
26  
27 *“I noticed a lady once at (\*\*\*\*\*) station standing very close to the edge. The*  
28 *behaviour seemed very strange as she took her coat off and folded it up then put her*  
29 *handbag down, then stood near the edge of the platform. I asked the lady if she was*  
30 *ok and mentioned that she should stand behind the yellow line, after this she just put*  
31 *her coat back on and left the station”*  
32  
33

34  
35 (Role redacted to protect anonymity, 15+ years in job)  
36

### 37 **Allowing trains to pass by**

38  
39 Eight clips showed individuals allowing trains to pass by (three clips did not show sufficient  
40 footage, four clips showed no trains passing on the same platform). The individuals in these  
41 clips often spent a substantial amount of time at the platforms in comparison to those who  
42 jumped/got onto the tracks in front of the first train that arrived (N=5). Several reasons could  
43 be suggested for this behaviour, such as mentally preparing oneself to end one’s life or  
44 waiting for the platform to be less crowded. Significantly, this behaviour means that people  
45 spend more time on the platform and can increase the time for an intervention to occur.  
46  
47  
48  
49

50  
51  
52 Two interview participants mentioned their reasoning for allowing trains to pass by, which  
53 suggests they waited for the platform to be less crowded and/or they were working up the  
54 courage to jump/get onto the tracks:  
55  
56  
57

1  
2  
3 *“But yeah and then I went down to the Underground and didn’t get on a train at all*  
4 *but I did walk between a few of the difficult platforms and lines so yeah I had no*  
5 *intention of getting on a train.” And “Late evening so I’d waited till after rush hour*  
6 *and I’d gone down and I just spent so long trying to find a time when there was*  
7 *definitely no young people, like somehow children I definitely couldn’t do it if there*  
8 *was any kids anywhere. And then all these people going back from work I felt really*  
9 *guilty they were going to be late and they weren’t going to see their families or people*  
10 *would be disrupted. It was such a big thing, and then I was trying to wait until it was*  
11 *quiet and there was no-one around.” (Interviewee A6)*  
12  
13  
14  
15  
16  
17

18  
19 *“I kept like waiting for like a platform to be completely empty. Because I didn’t want*  
20 *anyone to see me.” And “Because I couldn’t do... I don’t know what it was. And I*  
21 *remember... I had spent about 15 minutes at X [station]. Maybe a little more. Kind of*  
22 *like willing myself to do it.” (Interviewee A8)*  
23  
24  
25  
26

27 Staff (15%, N=19) also reported that waiting for long periods of time at the platform/station  
28 could be a potential indicator that someone is going to make a suicide attempt.  
29  
30

### 31 32 **Repetitive behaviour**

33 Those individuals in the footage that did not jump/get onto the tracks immediately once  
34 entering the station (N=11) carried out a number of repetitive behaviours. Some of these  
35 could be considered ‘normal’ such as pacing/fidgeting, and therefore unlikely to be noticed  
36 by other people as ‘abnormal.’ However, these individuals also carried out several repetitive  
37 behaviours which could be noticeable by station staff or other people if the person was  
38 observed. These behaviours included: station hopping, switching platforms, walking up to the  
39 platform edge then returning to the wall/seating area, walking up and down the platform,  
40 walking up and down stairs/escalators. One interview participant mentioned his repetitive  
41 behaviour being significant:  
42  
43  
44  
45  
46  
47  
48  
49

50 *“I’d gone into town specifically to step in front of a train... I kept going back and*  
51 *forth between like a bench and the edge of the platform.” And “There’s always going*  
52 *to be some kind of warning sign... For example, like, to go with my experience, I was*  
53 *sitting at the point where the trains come in, like, the edge of the tunnel. And I was on*  
54 *that spot for about... upwards of 15 minutes. Like going, sitting on a bench, and then*  
55  
56  
57  
58  
59  
60

1  
2  
3 *like when I could hear the train coming I would go to the edge of the platform... And*  
4 *then when I couldn't do it, I'd go back to the bench." (Interviewee A8)*  
5  
6

7  
8 Ten staff respondents (10%) identified pacing behaviour as being a cause for concern, and  
9 others (13%, N=17) noted that signs of agitation and distress can also be a warning sign.  
10

### 11 12 **Trying to look normal**

13  
14 Two interview participants reported having tried to blend in and 'look normal' at the time of  
15 their attempt. This could potentially explain some of the behaviour identified in the CCTV  
16 data, such as people who were looking at their phones and an individual who picked up a  
17 paper and seemed to be reading it just before jumping:  
18  
19

20  
21  
22 *"I was trying to look normal and look like I had some purpose." (Interviewee A6)*  
23

24  
25 *"I was wearing my earphones... To kind of like... no one's going to bother me*  
26 *because I'm listening to my music." (Interview A8)*  
27  
28

29  
30 In contrast, staff felt that individuals who were about to make an attempt would show clear  
31 signs of distress or of "behaving in an odd manner", even when "being quiet so as to not draw  
32 attention to themselves". Indeed, a visibly distressed and "unusual" appearance was the  
33 behavioural sign most often identified as concerning by staff participants, including both  
34 those who had direct and indirect experience of working with suicidal individuals (see figures  
35 1 & 2). Many described this as a markedly "withdrawn", "zoned out" appearance, seemingly  
36 "devoid of emotion" and "disinterested in surroundings". "Staring at the track" and "staring  
37 into space" were both mentioned under this category, as were "sitting with their heads down"  
38 or "in their hands" and "looking lost", "in their own world" with "a sunken inward look of  
39 lost hope". Others discussed having (also) witnessed a more 'outward' pattern of "panicked",  
40 "agitated" and "erratic behaviour", including "throwing belongings across the station" and  
41 having "incoherent conversations", and a "dishevelled", "drunk" appearance.  
42  
43  
44  
45  
46  
47  
48  
49  
50

51  
52 Whilst these responses suggest that individuals may not always seek or succeed to 'look  
53 normal' before a suicide attempt, some staff also commented on the difficult task of  
54 identifying potentially suicidal individuals as there are, at times, no warning signs:  
55  
56  
57

1  
2  
3 *“Suicidal people don’t really stand out until they make a move for a jump or go onto the*  
4 *track, suicidal persons come in all shapes and sizes and socioeconomic backgrounds,*  
5 *there is no stereotypical sign attributable”*

6  
7  
8 (Mobile Operations Manager, 6-10 years in job)

9  
10  
11 *“Very rare to find someone as they tend to hide in out the way places. If a cry for help, the*  
12 *person will normally be spotted at the end of a platform or around a public footpath*  
13 *crossing, hanging around alone. A very difficult question to answer as it is actually rare*  
14 *to find someone in that state. Those I have encountered have been distressed and just look*  
15 *‘alone’ with no purpose other than lost in their own thoughts”*

16  
17  
18  
19 (Mobile Operations Manager, 15+ years in job)

20  
21  
22 [Insert figures 1 & 2 about here]

## 23 24 25 **Discussion**

26  
27 Previous research has identified behaviours that may precede a rail suicide attempt such as  
28 erratic movements and leaving belongings behind<sup>5, 7, 8</sup>, however much of this research has  
29 focussed on the perspectives of witnesses to these events, whose memories may be subject to  
30 memory bias. The current research has for the first time brought together CCTV data of  
31 people who have died by suicide on the railways, data from individuals who have attempted  
32 suicide by rail and data from frontline staff who deal with suicides at railway/tube locations.

33  
34  
35  
36  
37  
38 Our findings suggest that it can be difficult to detect those who may be about to end their  
39 lives at stations, yet some forms of repetitive behaviour which appear outside of ‘normal’  
40 commuting behaviour have the potential to signify that someone may be a risk of suicide.  
41 Five of the 16 individuals whose footage we analysed jumped in front of the first train to  
42 arrive on the platform (though in all cases but one there was a delay between their arrival on  
43 the platform and the first train going past). However, other individuals in the footage showed  
44 distinctive behaviours that would not be normally expected in commuters, such as moving  
45 between platforms, station hopping and waiting at the station for a significant amount of time  
46 whilst allowing trains to pass by. These behaviours were also commented on by those who  
47 had survived a rail attempt and staff. In turn, this has two important implications: 1) station  
48 hopping means that these individuals spend a longer time in the railway/underground system,  
49 therefore increasing the chance of an intervention; 2) platform switching could be a

1  
2  
3 noticeable behaviour that falls outside of ‘normal’ commuting behaviour, again increasing the  
4 opportunity for intervention. Although it should be noted that these behaviours will not  
5 always predict that a person is preparing to end their life, but may act as an indicator to  
6 trained staff.  
7  
8

9  
10 Together our interview, survey and CCTV data, suggest that a visible presence of staff or  
11 other potential sources of support (including lay volunteers) may reduce the likelihood of an  
12 attempt being made. Additionally, the likelihood of intervention may be even greater if staff,  
13 including those monitoring CCTV, have heightened awareness of the time people spend on  
14 platforms, and if staff and other bystanders (including commuters) are aware of how to  
15 potentially spot and assist someone in distress. Staff reports of being approached by suicidal  
16 individuals suggest that having a presence at stations could also encourage suicidal  
17 individuals to seek help. Furthermore, the use of intelligent technology for identifying  
18 behavioural algorithms<sup>15</sup> could be adapted to identify suicidal behaviours - but rigorous  
19 testing would be necessary to ensure that this was neither over sensitive nor under sensitive to  
20 these types of behaviours.  
21  
22  
23  
24  
25  
26  
27  
28  
29

30 **Limitations:** The current research must be considered within its limitations. It is important  
31 to note that the CCTV included is a small sample of station incidents chosen by BTP, which  
32 will not necessarily reflect every person’s behaviour in this situation, and may not be  
33 generalisable to behaviour in other railway locations such as tracks, bridges, or level  
34 crossings. A more in-depth analysis of CCTV footage would need to be carried out, ideally  
35 with a focus on locations that are known to be ‘high-risk’ or in more rural locations. In  
36 addition, the clips we analysed are limited to footage of those who died by suicide. Analysing  
37 footage of ‘life-saving interventions’ by a member of the public (potentially in comparison to  
38 CCTV data of both suicide/attempted suicide and of ‘normal’/incident-free platform  
39 behaviour) may provide important learning on the role of bystanders - and potential bystander  
40 interventions - in rail suicide prevention.  
41  
42  
43  
44  
45  
46  
47  
48  
49

50 The staff survey and interview study were also based on small samples, and as such not  
51 generalisable. In addition, both are subject to the potential biases and other methodological  
52 limitations common to self-report data. Nonetheless, there are some distinct similarities, and  
53 ‘triangulation’, in the findings of the three studies reported, which strengthen their  
54 conclusions.  
55  
56  
57



1  
2  
3  
4 **Conclusion:** Identification of behaviour that precedes a rail suicide or suicide attempt can be  
5 difficult, but potentially very useful to inform suicide prevention efforts in these settings.  
6 Using a multi-methodological approach, we identified a range of behaviours and other  
7 potential warning signs immediately preceding suicidal behaviour on the rails. This includes  
8 behaviours which could be easily dismissed as ‘normal’ commuting behaviour (such as  
9 pacing up and down a station platform or fidgeting), but also behaviours such as station  
10 hopping, platform switching, and spending a long time at specific locations which arguably  
11 fall outside of ‘normal’ commuting behaviour. Our findings, although based on small  
12 samples, suggest that these behaviours are largely repetitive and could present important  
13 opportunities for identification and intervention in locations where platform screen doors are  
14 not or cannot be put in place<sup>16</sup>. The findings from this research (and from the *Quest study*)  
15 have been used in the development of a national campaign by the railways called ‘small talk  
16 saves lives.’ The campaign aims to encourage commuters to engage in conversation with  
17 people who appear visibly distressed at railway locations, in order to interrupt the suicidal  
18 thought process, and ultimately prevent suicides.  
19  
20  
21  
22  
23  
24  
25  
26  
27  
28  
29  
30  
31  
32  
33  
34  
35  
36  
37  
38  
39  
40  
41  
42  
43  
44  
45  
46  
47  
48  
49  
50  
51  
52  
53  
54  
55  
56  
57  
58  
59  
60

## References

1. Rail Safety and Standards Board. Improving suicide prevention measures on the rail network in Great Britain. 2014.
2. Office of Rail and Road. Rail Safety Statistics, 2015-16 Annual Statistical Release. Office of National Statistics 2016.
3. Rail Safety and Standards Board. Annual Safety Performance Report 2015/16, A reference guide to safety trends on GB railways. 2016.
4. Network Rail. Suicide Prevention on the Railway. 2016.
5. Mishara BL, Bardon C. Systematic review of research on railway and urban transit system suicides. *Journal of affective disorders*. 2016;193:215-26.
6. Runeson BS, Beskow J, Waern M. The suicidal process in suicides among young people. *Acta Psychiatrica Scandinavica*. 1996;93(1):35-42.
7. Lukaschek K, Baumert J, Ladwig K-H. Behaviour patterns preceding a railway suicide: Explorative study of German Federal Police officers' experiences. *BMC public health*. 2011;11(1):620.
8. Mishara BL, Bardon C, Dupont S. Can CCTV identify people in public transit stations who are at risk of attempting suicide? An analysis of CCTV video recordings of attempters and a comparative investigation. *BMC public health*. 2016;16(1):1245.
9. Rådbo H, Svedung I, Andersson R. Suicides and other fatalities from train-person collisions on Swedish railroads: A descriptive epidemiologic analysis as a basis for systems-oriented prevention. *Journal of Safety Research*. 2005 2005/01/01/;36(5):423-8.
10. Dinkel A, Baumert J, Erazo N, Ladwig K-H. Jumping, lying, wandering: Analysis of suicidal behaviour patterns in 1,004 suicidal acts on the German railway net. *Journal of psychiatric research*. 2011;45(1):121-5.
11. Heath C, Hindmarsh J, Luff P. Video in qualitative research: Sage Publications; 2010.
12. Braun V, Clarke V. Using thematic analysis in psychology. *Qualitative research in psychology*. 2006;3(2):77-101.
13. Braun V, Clarke V. Successful qualitative research: A practical guide for beginners. Hampshire: Sage; 2013.
14. Thorne S. Data analysis in qualitative research. *Evidence-based nursing*. 2000;3(3):68-70.
15. Wang X. Intelligent multi-camera video surveillance: A review. *Pattern recognition letters*. 2013;34(1):3-19.

1  
2  
3 16. Rådbo H, Svedung I, Andersson R. Suicide prevention in railway systems:  
4 Application of a barrier approach. *Safety Science*. 2008;46(5):729-37.  
5  
6  
7  
8  
9  
10  
11

- 
- 12 • **Contributors** Study design was carried out by all authors. Recruitment for interviews was  
13 carried out by JB, BF, IK, JM and LM (i.e. via an online survey). Recruitment for the staff  
14 survey was carried out by EH and IN. JM and JB conducted and analysed the interviews. JM  
15 analysed the CCTV data, which was checked and second coded by JB. Staff survey data was  
16 collected and analysed by EH and checked for consistency by IN. The article was written by  
17 JM with contributions from all other authors.  
18
  - 19 • **Funding** This study was commissioned by the Samaritans and funded by Network Rail.  
20
  - 21 • **Competing interests** None declared.
  - 22 • **Ethics approval** The Research Ethics Committees at Middlesex, Westminster and King's  
23 College London Universities granted ethical approval for this research.  
24
  - 25 • **Data sharing statement** Our results section of this manuscript provides illustrative examples  
26 of our data which have anonymised. Due to the qualitative nature of this study we cannot  
27 make full transcripts, footage or survey data available as these could potential identify our  
28 participants.  
29  
30

---

31  
32  
33  
34 Figure 1: Behaviours and warning signs identified by staff with direct experience of rail  
35 suicide prior to an incident  
36

37 Figure 2: Behavioural antecedents and warning signs identified by staff with indirect  
38 experience of railway suicide  
39  
40  
41  
42  
43  
44  
45  
46  
47  
48  
49  
50  
51  
52  
53  
54  
55  
56  
57  
58  
59  
60

1  
2  
3  
4  
5  
6  
7  
8  
9  
10  
11  
12  
13  
14  
15  
16  
17  
18  
19  
20  
21  
22  
23  
24  
25  
26  
27  
28  
29  
30  
31  
32  
33  
34  
35  
36  
37  
38  
39  
40  
41  
42  
43  
44  
45  
46  
47  
48  
49  
50  
51  
52  
53  
54  
55  
56  
57  
58  
59  
60

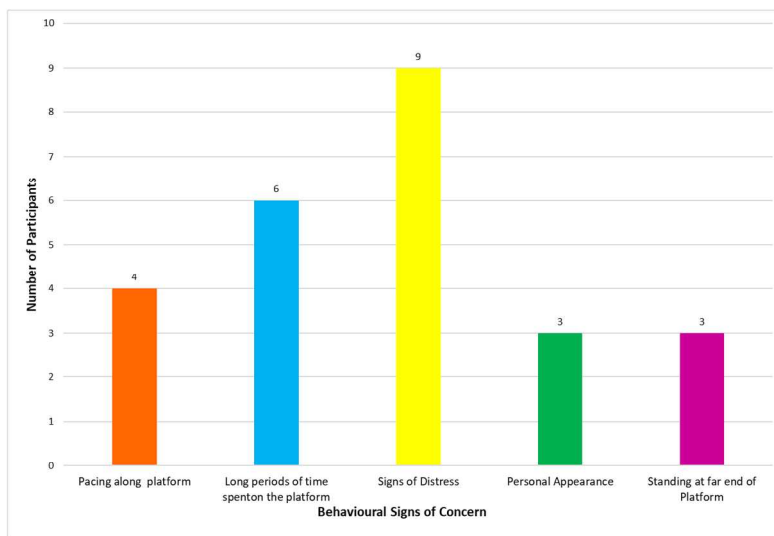

Figure 1: Behaviours and warning signs identified by staff with direct experience of rail suicide prior to an incident

338x190mm (300 x 300 DPI)

Review only

1  
2  
3  
4  
5  
6  
7  
8  
9  
10  
11  
12  
13  
14  
15  
16  
17  
18  
19  
20  
21  
22  
23  
24  
25  
26  
27  
28  
29  
30  
31  
32  
33  
34  
35  
36  
37  
38  
39  
40  
41  
42  
43  
44  
45  
46  
47  
48  
49  
50  
51  
52  
53  
54  
55  
56  
57  
58  
59  
60

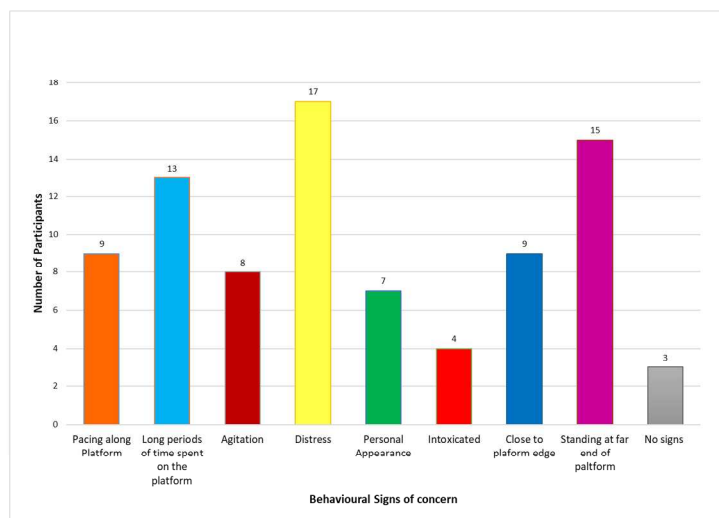

Figure 2: Behavioural antecedents and warning signs identified by staff with indirect experience of railway suicide

338x190mm (300 x 300 DPI)

Review only

## Staff survey questionnaire items

1) *I consent for the information I provide within this questionnaire to be used within the final report of this study*

-Yes

-No

### **Demographics**

2) *Are you male or Female?*

-Yes

-No

-Prefer not to answer

3) *What is your age range?*

18-24 years old

25-34 years old

35-44 years old

45-54 years old

55-64years old

65+ years old

Prefer not to answer

4) *What is your current job role?*

5) *How long have you been in this job role?*

0-5 years

6-10 years

11-15 years

16-20years

21 years or more

Prefer not to answer

### **Training**

6) *What training have you received with regards to identifying and managing people whose behaviour is a cause for concern in relation to their suicide risk?*

7) *What training have you received about suicide awareness/prevention?*

### **Experience**

8) *What have you noticed about someone on the railway that has caused you concern about whether or not they might be suicidal?*

1  
2  
3 9) *What else would cause you concern in terms of their behaviour or appearance?*

4  
5 10) *Has anyone ever spoken to you on or near a station about feeling suicidal?*

6  
7 11) *If yes, what did they say and how did you respond to this?*

8  
9 12) *What may have helped you in this situation?*

10  
11 13) *Have you ever been contacted by health professional regarding known high risk patients  
12 who may have absconded from nearby hospitals?*

13  
14 14) *Have you ever been contacted by the police regarding known high risk patients who may  
15 have absconded from nearby hospitals?*

16  
17  
18  
19 **Imagined experience**

20  
21 15) *Who do you think is best placed to report behaviours that cause you concern? (e.g.  
22 yourself, members of the public, those who monitor CCTV cameras, station cleaners etc.)*

23  
24 16) *Who do you think is best placed to act on behaviours that cause you concern? (e.g.  
25 yourself, your manager, members of the public, those who monitor CCTV cameras etc.)*

26  
27 17) *What makes you think these people are best placed?*

28  
29 18) *What else might help you or your colleagues reduce suicide on the railway?*

30  
31 19) *What do you think is the impact of media reporting when an incident does happen on the  
32 railways?*

33  
34 20) *Do you think trained professionals in known hotspots will make a difference?*

35  
36 21) *Why?*

37  
38 22) *What factors do you think impact on rail staffs abilities to notice and manage  
39 risks/incidents?*

40  
41  
42  
43 **Taking the perspective of the suicidal person**

44  
45 23) *Why do you think people choose certain stations?*

46  
47 24) *Have you noticed particular months, days, times, spots etc. when individuals commit or  
48 attempt to commit suicide?*

49  
50 25) *What makes you think an individual's behaviour is or is not serious in terms of harming  
51 themselves?*

### **Actual interventions**

26) *If you observed a person whose behaviour or appearance you thought was a cause for concern, what actions would you take?*

27) *What has/does prevent you from acting on any concern?*

28) *Is there a reporting framework for incidents/near misses?*

-Yes

-No

29) *What would you consider to be a near miss? What would you report or not report?*

30) *How can these reporting frameworks be improved so we can better learn from them?*

31) *Have you noticed Samaritans posters or phones on station platforms?*

-Yes

-No

32) *If you observed a person whose behaviour or appearance you thought was a cause for concern, what actions would you take?*

33) *What measures do you know of that have already been put into place to help prevent rail suicides?*

34) *What of these measures have you found to be helpful? Why?*

35) *What do you think has not been helpful? Why?*

36) *Specifically what measures have been put into place to support staff in identifying suicidal intentions?*

### **Recommended interventions**

37) *What would support you or further support you in acting on any concerns?*

38) *How do you think we can deepen our knowledge about recognisable risk factors so that those at risk can be identified earlier?*

39) *Is there anything else you would like to say about rail suicides in general?*



## Standards for Reporting Qualitative Research (SRQR)\*

<http://www.equator-network.org/reporting-guidelines/srqr/>

Page/line no(s).

### Title and abstract

|                                                                                                                                                                                                                                                              |      |
|--------------------------------------------------------------------------------------------------------------------------------------------------------------------------------------------------------------------------------------------------------------|------|
| <p><b>Title</b> - Concise description of the nature and topic of the study Identifying the study as qualitative or indicating the approach (e.g., ethnography, grounded theory) or data collection methods (e.g., interview, focus group) is recommended</p> | Pg 1 |
| <p><b>Abstract</b> - Summary of key elements of the study using the abstract format of the intended publication; typically includes background, purpose, methods, results, and conclusions</p>                                                               | Pg 2 |

### Introduction

|                                                                                                                                                                     |                |
|---------------------------------------------------------------------------------------------------------------------------------------------------------------------|----------------|
| <p><b>Problem formulation</b> - Description and significance of the problem/phenomenon studied; review of relevant theory and empirical work; problem statement</p> | Pg 3-4, 68-108 |
| <p><b>Purpose or research question</b> - Purpose of the study and specific objectives or questions</p>                                                              | P4, 116-117    |

### Methods

|                                                                                                                                                                                                                                                                                                                                                                                                             |                                                              |
|-------------------------------------------------------------------------------------------------------------------------------------------------------------------------------------------------------------------------------------------------------------------------------------------------------------------------------------------------------------------------------------------------------------|--------------------------------------------------------------|
| <p><b>Qualitative approach and research paradigm</b> - Qualitative approach (e.g., ethnography, grounded theory, case study, phenomenology, narrative research) and guiding theory if appropriate; identifying the research paradigm (e.g., postpositivist, constructivist/ interpretivist) is also recommended; rationale**</p>                                                                            | P4, 131-137,<br>Pg5, 154-161,<br>Pg6, 185-193                |
| <p><b>Researcher characteristics and reflexivity</b> - Researchers' characteristics that may influence the research, including personal attributes, qualifications/experience, relationship with participants, assumptions, and/or presuppositions; potential or actual interaction between researchers' characteristics and the research questions, approach, methods, results, and/or transferability</p> | Pg 1, 1-2,<br>Pg 4, 135-138<br>Pg 6, 159-161<br>Pg7, 191-193 |
| <p><b>Context</b> - Setting/site and salient contextual factors; rationale**</p>                                                                                                                                                                                                                                                                                                                            | Pg4-5, 125-130<br>Pg6, 147-150<br>Pg6, 170-177               |
| <p><b>Sampling strategy</b> - How and why research participants, documents, or events were selected; criteria for deciding when no further sampling was necessary (e.g., sampling saturation); rationale**</p>                                                                                                                                                                                              | Pg4, 125-130<br>Pg5, 142-147<br>Pg5, 171-184                 |
| <p><b>Ethical issues pertaining to human subjects</b> - Documentation of approval by an appropriate ethics review board and participant consent, or explanation for lack thereof; other confidentiality and data security issues</p>                                                                                                                                                                        | Pg 17, 499-500                                               |
| <p><b>Data collection methods</b> - Types of data collected; details of data collection procedures including (as appropriate) start and stop dates of data collection and analysis, iterative process, triangulation of sources/methods, and modification of procedures in response to evolving study findings; rationale**</p>                                                                             | Pg4, 125-130<br>Pg5, 142-147<br>Pg5, 171-184                 |

|    |                                                                                         |               |
|----|-----------------------------------------------------------------------------------------|---------------|
| 1  |                                                                                         |               |
| 2  | <b>Data collection instruments and technologies</b> - Description of instruments (e.g., | Pg4, 125-130  |
| 3  | interview guides, questionnaires) and devices (e.g., audio recorders) used for data     | Pg5, 142-153  |
| 4  | collection; if/how the instrument(s) changed over the course of the study               | Pg5, 163-175  |
| 5  |                                                                                         |               |
| 6  | <b>Units of study</b> - Number and relevant characteristics of participants, documents, | Pg4, 125-130  |
| 7  | or events included in the study; level of participation (could be reported in results)  | Pg5, 142-153  |
| 8  |                                                                                         | Pg5, 163-175  |
| 9  | <b>Data processing</b> - Methods for processing data prior to and during analysis,      | P4, 131-137,  |
| 10 | including transcription, data entry, data management and security, verification of      | Pg5, 154-161, |
| 11 | data integrity, data coding, and anonymization/de-identification of excerpts            | Pg6, 185-193  |
| 12 |                                                                                         |               |
| 13 | <b>Data analysis</b> - Process by which inferences, themes, etc., were identified and   | P4, 131-137,  |
| 14 | developed, including the researchers involved in data analysis; usually references a    | Pg5, 154-161, |
| 15 | specific paradigm or approach; rationale**                                              | Pg6, 185-193  |
| 16 |                                                                                         |               |
| 17 | <b>Techniques to enhance trustworthiness</b> - Techniques to enhance trustworthiness    | Pg5, 135-138  |
| 18 | and credibility of data analysis (e.g., member checking, audit trail, triangulation);   | Pg6, 160-161  |
| 19 | rationale**                                                                             | Pg7, 191-193  |
| 20 |                                                                                         |               |

## Results/findings

|    |                                                                                             |                 |
|----|---------------------------------------------------------------------------------------------|-----------------|
| 21 |                                                                                             |                 |
| 22 |                                                                                             |                 |
| 23 | <b>Synthesis and interpretation</b> - Main findings (e.g., interpretations, inferences, and |                 |
| 24 | themes); might include development of a theory or model, or integration with                |                 |
| 25 | prior research or theory                                                                    | Pg7-13, 195-382 |
| 26 |                                                                                             |                 |
| 27 | <b>Links to empirical data</b> - Evidence (e.g., quotes, field notes, text excerpts,        |                 |
| 28 | photographs) to substantiate analytic findings                                              | Pg7-13, 195-382 |
| 29 |                                                                                             |                 |

## Discussion

|    |                                                                                           |               |
|----|-------------------------------------------------------------------------------------------|---------------|
| 30 |                                                                                           |               |
| 31 |                                                                                           |               |
| 32 | <b>Integration with prior work, implications, transferability, and contribution(s) to</b> |               |
| 33 | <b>the field</b> - Short summary of main findings; explanation of how findings and        |               |
| 34 | conclusions connect to, support, elaborate on, or challenge conclusions of earlier        | Pg13-15, 384- |
| 35 | scholarship; discussion of scope of application/generalizability; identification of       | 447           |
| 36 | unique contribution(s) to scholarship in a discipline or field                            |               |
| 37 |                                                                                           |               |
| 38 | <b>Limitations</b> - Trustworthiness and limitations of findings                          | Pg14, 418-432 |
| 39 |                                                                                           |               |

## Other

|    |                                                                                            |            |
|----|--------------------------------------------------------------------------------------------|------------|
| 40 |                                                                                            |            |
| 41 |                                                                                            |            |
| 42 | <b>Conflicts of interest</b> - Potential sources of influence or perceived influence on    |            |
| 43 | study conduct and conclusions; how these were managed                                      | Pg17, 498  |
| 44 |                                                                                            |            |
| 45 | <b>Funding</b> - Sources of funding and other support; role of funders in data collection, |            |
| 46 | interpretation, and reporting                                                              | Pg 17, 497 |
| 47 |                                                                                            |            |

\*The authors created the SRQR by searching the literature to identify guidelines, reporting standards, and critical appraisal criteria for qualitative research; reviewing the reference lists of retrieved sources; and contacting experts to gain feedback. The SRQR aims to improve the transparency of all aspects of qualitative research by providing clear standards for reporting qualitative research.

1  
2  
3  
4  
5  
6  
7  
8  
9  
10  
11  
12  
13  
14  
15  
16  
17  
18  
19  
20  
21  
22  
23  
24  
25  
26  
27  
28  
29  
30  
31  
32  
33  
34  
35  
36  
37  
38  
39  
40  
41  
42  
43  
44  
45  
46  
47  
48  
49  
50  
51  
52  
53  
54  
55  
56  
57  
58  
59  
60

\*\*The rationale should briefly discuss the justification for choosing that theory, approach, method, or technique rather than other options available, the assumptions and limitations implicit in those choices, and how those choices influence study conclusions and transferability. As appropriate, the rationale for several items might be discussed together.

**Reference:**

O'Brien BC, Harris IB, Beckman TJ, Reed DA, Cook DA. **Standards for reporting qualitative research: a synthesis of recommendations.** *Academic Medicine*, Vol. 89, No. 9 / Sept 2014  
DOI: 10.1097/ACM.0000000000000388

For peer review only
