# Supplementary material for: Behaviours preceding suicides at railway and underground locations: a multimethodological qualitative approach
Source: PubMed Central journal article supplement — BMJ Open. 2018 Apr 10;8(4):e021076. doi: 10.1136/bmjopen-2017-021076 (PMC5898325; doi:10.1136/bmjopen-2017-021076), 2018-04-10
Supplement: bmjopen-2017-021076supp001.pdf [file bmjopen-2017-021076supp001.pdf]

## Staff survey questionnaire items

1) *I consent for the information I provide within this questionnaire to be used within the final report of this study*

-Yes

-No

### **Demographics**

2) *Are you male or Female?*

-Yes

-No

-Prefer not to answer

3) *What is your age range?*

18-24 years old

25-34 years old

35-44 years old

45-54 years old

55-64years old

65+ years old

Prefer not to answer

4) *What is your current job role?*

5) *How long have you been in this job role?*

0-5 years

6-10 years

11-15 years

16-20years

21 years or more

Prefer not to answer

### **Training**

6) *What training have you received with regards to identifying and managing people whose behaviour is a cause for concern in relation to their suicide risk?*

7) *What training have you received about suicide awareness/prevention?*

### **Experience**

8) *What have you noticed about someone on the railway that has caused you concern about whether or not they might be suicidal?*

- 9) *What else would cause you concern in terms of their behaviour or appearance?*
- 10) *Has anyone ever spoken to you on or near a station about feeling suicidal?*
- 11) *If yes, what did they say and how did you respond to this?*
- 12) *What may have helped you in this situation?*
- 13) *Have you ever been contacted by health professional regarding known high risk patients who may have absconded from nearby hospitals?*
- 14) *Have you ever been contacted by the police regarding known high risk patients who may have absconded from nearby hospitals?*

### **Imagined experience**

- 15) *Who do you think is best placed to report behaviours that cause you concern? (e.g. yourself, members of the public, those who monitor CCTV cameras, station cleaners etc.)*
- 16) *Who do you think is best placed to act on behaviours that cause you concern? (e.g. yourself, your manager, members of the public, those who monitor CCTV cameras etc.)*
- 17) *What makes you think these people are best placed?*
- 18) *What else might help you or your colleagues reduce suicide on the railway?*
- 19) *What do you think is the impact of media reporting when an incident does happen on the railways?*
- 20) *Do you think trained professionals in known hotspots will make a difference?*
- 21) *Why?*
- 22) *What factors do you think impact on rail staffs abilities to notice and manage risks/incidents?*

### **Taking the perspective of the suicidal person**

- 23) *Why do you think people choose certain stations?*
- 24) *Have you noticed particular months, days, times, spots etc. when individuals commit or attempt to commit suicide?*
- 25) *What makes you think an individual's behaviour is or is not serious in terms of harming themselves?*

### **Actual interventions**

26) *If you observed a person whose behaviour or appearance you thought was a cause for concern, what actions would you take?*

27) *What has/does prevent you from acting on any concern?*

28) *Is there a reporting framework for incidents/near misses?*

-Yes

-No

29) *What would you consider to be a near miss? What would you report or not report?*

30) *How can these reporting frameworks be improved so we can better learn from them?*

31) *Have you noticed Samaritans posters or phones on station platforms?*

-Yes

-No

32) *If you observed a person whose behaviour or appearance you thought was a cause for concern, what actions would you take?*

33) *What measures do you know of that have already been put into place to help prevent rail suicides?*

34) *What of these measures have you found to be helpful? Why?*

35) *What do you think has not been helpful? Why?*

36) *Specifically what measures have been put into place to support staff in identifying suicidal intentions?*

### **Recommended interventions**

37) *What would support you or further support you in acting on any concerns?*

38) *How do you think we can deepen our knowledge about recognisable risk factors so that those at risk can be identified earlier?*

39) *Is there anything else you would like to say about rail suicides in general?*
